# Supplementary material for: Multi-platform synthesis of ondansetron featuring process intensification in flow
Source: Royal Society of Chemistry journal article supplement (doi:10.1039/d3re00249g), 2023-01-01
Supplement: d3re00249g1.pdf [file d3re00249g1.pdf]

**Supporting Information  
for**

**Multi-Platform Synthesis of Ondansetron Featuring Process  
Intensification in Flow**

Yoshio Hato<sup>a,b</sup> and Timothy F. Jamison<sup>a\*</sup>

<sup>a</sup> *Department of Chemistry, Massachusetts Institute of Technology, 77 Massachusetts Avenue,  
Cambridge, Massachusetts 02139, United States*

<sup>b</sup> *Shionogi Pharmaceutical Research Center, Shionogi & Co., Ltd., Toyonaka, Osaka 561-0825,  
Japan*

Email: tfj@mit.edu

**Table of Contents**

|                                                                   |     |
|-------------------------------------------------------------------|-----|
| 1. General Information                                            | S2  |
| 2. Experimental Procedures, Compound Characterization and Spectra | S4  |
| 3. References                                                     | S31 |

## 1. General Information

### *Methods:*

All reactions were performed with commercially available reagents and solvents that were used as received unless otherwise specified. The reagents and solvents were purchased from Sigma Aldrich, Alfa Aesar, TCI, Combi-Blocks, Thermo Scientific, Oakwood Chemical or STREAM Chemicals. Batch reactions were performed in round bottom flasks under an argon or nitrogen atmosphere unless otherwise noted. Flow reactions were performed using the commercially available components supplied from IDEX Health & Science, Upchurch Scientific, Swagelok Company, Harvard Apparatus, Syrris, Vapourtec, Zaiput Flow Technologies and Luzchem Research. Reactions were monitored by thin-layer chromatography (TLC), high-performance liquid chromatography (HPLC) or proton nuclear magnetic resonance ( $^1\text{H}$  NMR). Concentration and removal of solvents was performed using a Buchi Rotavapor R-210. Column chromatography was carried out using a prepackaged Teledyne ISCO RediSep High-Performance silica gel column on a Biotage Isolera chromatography system.

### *Instrumentation:*

Proton nuclear magnetic resonance ( $^1\text{H}$  NMR) spectra and proton-decoupled carbon nuclear magnetic resonance ( $^{13}\text{C}\{^1\text{H}\}$  NMR) spectra were recorded on either a two-channel Bruker Avance-III HD Nanobay spectrometer, a three-channel Bruker Avance Neo spectrometer, or a two-channel JEOL ECZ spectrometer at ambient temperature at operating frequencies of 500/400 MHz ( $^1\text{H}$ ) or 125/100 MHz ( $^{13}\text{C}$ ). Chemical shifts ( $\delta$ ) are reported in parts per million (ppm) relative to the solvent residual peak ( $\text{CDCl}_3$ ; 7.26 ppm for  $^1\text{H}$  NMR and 77.16 ppm for  $^{13}\text{C}$  NMR). Data are represented as follows: chemical shift, multiplicity (br = broad, s = singlet, d = doublet, t = triplet, q = quartet, p = pentet, m = multiplet, o = overlap), coupling constants ( $J$ ) in Hertz (Hz), integration. 1,3,5-Trimethoxybenzene and dimethyl terephthalate were used as an internal standard for quantitative  $^1\text{H}$  NMR spectroscopy. High-performance liquid chromatography (HPLC) analysis was performed using an Agilent 1200 series quaternary HPLC system with an Agilent Poroshell 120 EC-C18 2.7  $\mu\text{m}$ , 4.6x50 mm column. The HPLC measurement conditions were as follows: flow rate: 1.000 mL/min, UV detection wavelength: 254 and 210 nm, mobile phase: [A] is 0.1% trifluoroacetic acid containing aqueous solution and [B] is 0.1% trifluoroacetic acid containing acetonitrile solution, gradient: linear gradient of 5% to 100% solvent [B] for 10 minutes was performed and 100% solvent [B] was maintained for 2 minutes and 5% solvent [B] was maintained for 2 minutes, column temperature: 35  $^\circ\text{C}$ , injection volume: 2.00  $\mu\text{L}$ , sample preparation: an appropriate amount of samples was dissolved in 1 mL of 80% MeCN aq. High-resolution mass spectrometry data were acquired on a JEOL AccuTOF 4F LC-plus equipped with an ionSense DART (Direct Analysis in Real Time) source. IR spectra were recorded on a Bruker Alpha II FTIR spectrometer with a Diamond Crystal ATR (attenuated total reflectance) accessory and only significant absorptions were listed.

***Abbreviations used:***

aq = aqueous, eq = equivalent, DCE = 1,2-dichloroethane, MeCN = acetonitrile, DOX = 1,4-dioxane, EtOH = ethanol, EtOAc = ethyl acetate, AcOH = acetic acid, ID = inside diameter, BPR = back pressure regulator,  $t_R$  = residence time,  $p$ -TsOH·H<sub>2</sub>O =  $p$ -toluenesulfonic acid monohydrate, NaHCO<sub>3</sub> = sodium hydrogencarbonate, MgSO<sub>4</sub> = magnesium sulfate, NMP = 1-methyl-2-pyrrolidinone, DMF = dimethylformaldehyde, DMA = dimethylacetaldehyde, DMSO = dimethylsulfoxide, THF = tetrahydrofurane, MeOH = methanol, IPA = 2-propanol, TFA = trifluoroacetic acid, Ac<sub>2</sub>O = acetic anhydride, MsOH = methanesulfonic acid.

## 2. Experimental Procedures, Compound Characterization and Spectra

### Reaction condition screening of step 1:

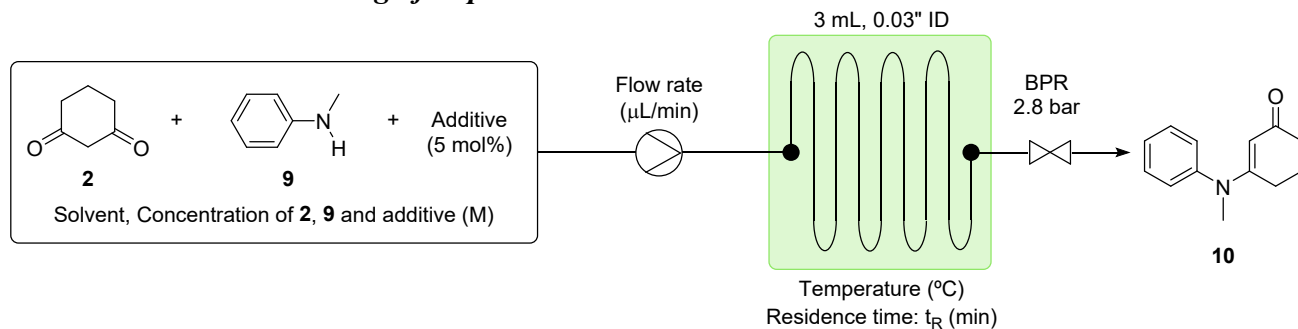

| entry          | reaction parameter |                                 |                  |                        |       |                              | NMR yield |    |
|----------------|--------------------|---------------------------------|------------------|------------------------|-------|------------------------------|-----------|----|
|                | solvent            | additive                        | conc. (M)        | temp.                  | $t_R$ | flow rate                    | 9         | 10 |
|                |                    |                                 | [2, 9, additive] | ( $^{\circ}\text{C}$ ) | (min) | ( $\mu\text{L}/\text{min}$ ) |           |    |
| 1              | DCE                | <i>p</i> -TsOH·H <sub>2</sub> O | 0.2, 0.2, 0.01   | 110                    | 30    | 100                          | 14        | 79 |
| 2 <sup>b</sup> | DCE                | <i>p</i> -TsOH·H <sub>2</sub> O | 0.2, 0.2, 0.01   | 130                    | 30    | 100                          | 15        | 79 |
| 3 <sup>b</sup> | DCE                | <i>p</i> -TsOH·H <sub>2</sub> O | 0.2, 0.2, 0.01   | 130                    | 60    | 50                           | 11        | 81 |
| 4              | MeCN               | <i>p</i> -TsOH·H <sub>2</sub> O | 0.2, 0.2, 0.01   | 110                    | 30    | 100                          | 30        | 61 |
| 5 <sup>b</sup> | EtOH               | <i>p</i> -TsOH·H <sub>2</sub> O | 0.2, 0.2, 0.01   | 110                    | 30    | 100                          | 64        | 25 |
| 6              | DOX                | <i>p</i> -TsOH·H <sub>2</sub> O | 0.2, 0.2, 0.01   | 110                    | 30    | 100                          | 21        | 70 |
| 7              | AcOH               | <i>p</i> -TsOH·H <sub>2</sub> O | 0.2, 0.2, 0.01   | 110                    | 30    | 100                          | 2.7       | 97 |
| 8              | AcOH               | -                               | 0.2, 0.2, -----  | 110                    | 30    | 100                          | 6.7       | 90 |
| 9              | AcOH               | -                               | 0.24, 0.2, ----- | 110                    | 30    | 100                          | 2.3       | 96 |
| 10             | AcOH               | -                               | 1.2, 1.0, -----  | 110                    | 30    | 100                          | 2.3       | 94 |
| 11             | AcOH               | -                               | 1.2, 1.0, -----  | 110                    | 5     | 600                          | 2.7       | 97 |
| 12             | AcOH               | -                               | 2.4, 2.0, -----  | 110                    | 5     | 600                          | 3.3       | 96 |

|    |      |                                 |                 |     |   |     |  |     |    |
|----|------|---------------------------------|-----------------|-----|---|-----|--|-----|----|
| 13 | AcOH | -                               | 2.4, 2.0, ----- | 120 | 5 | 600 |  | 4.0 | 96 |
| 14 | AcOH | -                               | 2.4, 2.0, ----- | 130 | 5 | 600 |  | 4.0 | 94 |
| 15 | AcOH | <i>p</i> -TsOH·H <sub>2</sub> O | 2.2, 2.0, ----- | 110 | 5 | 600 |  | 5.3 | 91 |

<sup>a</sup>The NMR yield was determined using 1,3,5-trimethoxybenzene as an internal standard. <sup>b</sup>6.9 bar of the back pressure was applied.

***Procedure for entries 1-9:***

*N*-Methylaniline **9** (0.54 mL, 5 mmol, 1 eq), 1,3-cyclohexanedione **2** (561 mg, 5 mmol, 1 eq or 673 mg, 6 mmol, 1.2 eq) and *p*-TsOH·H<sub>2</sub>O (0 mg, 0 mmol, 0 eq or 48 mg, 0.25 mmol, 0.05 eq) were added to a 25 mL volumetric flask. The designated solvent was added to the 25 mL line of the volumetric flask.

The reactor was constructed from the fluorinated ethylene propylene (FEP) tubing (1/16'' outside diameter, 0.03'' inside diameter, 658 cm, 3 mL), the complementary polyether ether ketone (PEEK) fittings, and the Upchurch Scientific's back pressure regulator (40 psi, 2.8 bar or 100 psi, 6.9 bar).

The prepared reactant solutions were pumped into the reactor by the Syrris Asia pump at the designated flow rate (50 or 100 μL/min). The reaction tube was immersed in an oil bath and heated at the designated temperature (110 or 130 °C). The reaction was equilibrated for 90 or 180 minutes, which was three times longer than the residence time. After the equilibration, 6 mL of the solution was collected for 60 or 120 minutes, depending on the flow rate. To the collected solution, was added 1,3,5-trimethoxybenzene (67.3 mg, 0.4 mmol, 1/3 eq of the collected reaction scale) as a standard compound. 0.1 mL of this solution was washed with 5% NaHCO<sub>3</sub> aq (6 mL), extracted with EtOAc three times (6+6+6 mL), dried over MgSO<sub>4</sub>, filtered, concentrated and analyzed by <sup>1</sup>H NMR. The methoxy peak (3.77 ppm, 9H) or the aromatic peak (6.08 ppm, 3H) of 1,3,5-trimethoxybenzene was used as a reference. The methyl peak (3.24 ppm, 3H) of the target compound **10**<sup>1</sup> and the methyl peak (2.84 ppm, 3H) of *N*-methylaniline **9** were used to determine the NMR yields.

***Procedure for entries 10-11:***

*N*-Methylaniline **9** (2.71 mL, 25 mmol, 1 eq), 1,3-cyclohexanedione **2** (3.36 g, 30 mmol, 1.2 eq) were added to a 25 mL volumetric flask. AcOH was added to the 25 mL line of the volumetric flask.

The reactor was constructed from the fluorinated ethylene propylene (FEP) tubing (1/16'' outside diameter, 0.03'' inside diameter, 658 cm, 3 mL), the complementary polyether ether ketone (PEEK) fittings, and the Upchurch Scientific's back pressure regulator (40 psi, 2.8 bar).

The prepared reactant solutions were pumped into the reactor by the Syrris Asia pump at the designated flow rate (100 or 600  $\mu\text{L}/\text{min}$ ). The reaction tube was immersed in an oil bath and heated at the designated temperature (110  $^{\circ}\text{C}$ ). The reaction was equilibrated for 15 or 90 minutes, which was three times longer than the residence time. After the equilibration, 6 mL of the solution was collected for 10 or 60 minutes, depending on the flow rate. To the collected solution, was added 1,3,5-trimethoxybenzene (336 mg, 2.0 mmol, 1/3 eq of the collected reaction scale) as a standard compound. 0.1 mL of this solution was washed with 5%  $\text{NaHCO}_3$  aq (6 mL), extracted with EtOAc three times (6+6+6 mL), dried over  $\text{MgSO}_4$ , filtered, concentrated and analyzed by  $^1\text{H}$  NMR. The methoxy peak (3.77 ppm, 9H) or the aromatic peak (6.08 ppm, 3H) of 1,3,5-trimethoxybenzene was used as a reference. The methyl peak (3.24 ppm, 3H) of the target compound **10**<sup>1</sup> and the methyl peak (2.84 ppm, 3H) of *N*-methylaniline **9** were used to determine the NMR yields.

***Procedure for entries 12-14:***

*N*-Methylaniline **9** (5.42 mL, 50 mmol, 1 eq), 1,3-cyclohexanedione **2** (6.73 g, 60 mmol, 1.2 eq) were added to a 25 mL volumetric flask. AcOH was added to the 25 mL line of the volumetric flask.

The reactor was constructed from the fluorinated ethylene propylene (FEP) tubing (1/16'' outside diameter, 0.03'' inside diameter, 658 cm, 3 mL), the complementary polyether ether ketone (PEEK) fittings, and the Upchurch Scientific's back pressure regulator (40 psi, 2.8 bar).

The prepared reactant solutions were pumped into the reactor by the Syrris Asia pump at the designated flow rate (600  $\mu\text{L}/\text{min}$ ). The reaction tube was immersed in an oil bath and heated at the designated temperature (110, 120 or 130  $^{\circ}\text{C}$ ). The reaction was equilibrated for 15 minutes, which was three times longer than the residence time. After the equilibration, 6 mL of the solution was collected for 10 minutes. To the collected solution, was added 1,3,5-trimethoxybenzene (673 mg, 4.0 mmol, 1/3 eq of the collected reaction scale) as a standard compound. 0.1 mL of this solution was washed with 5%  $\text{NaHCO}_3$  aq (6 mL), extracted with EtOAc three times (6+6+6 mL), dried over  $\text{MgSO}_4$ , filtered, concentrated and analyzed by  $^1\text{H}$  NMR. The methoxy peak (3.77 ppm, 9H) or the aromatic peak (6.08 ppm, 3H) of 1,3,5-trimethoxybenzene was used as a reference. The methyl peak (3.24 ppm, 3H) of the target compound **10**<sup>1</sup> and the methyl peak (2.84 ppm, 3H) of *N*-methylaniline **9** were used to determine the NMR yields.

***Procedure for entry 15:***

*N*-Methylaniline **9** (5.42 mL, 50 mmol, 1 eq), 1,3-cyclohexanedione **2** (6.17 g, 55 mmol, 1.1 eq) and *p*-TsOH $\cdot$ H<sub>2</sub>O (476 mg, 2.5 mmol, 0.05 eq) were added to a 25 mL volumetric flask. AcOH was added to the 25 mL line of the volumetric flask.

The reactor was constructed from the fluorinated ethylene propylene (FEP) tubing (1/16'' outside diameter, 0.03'' inside diameter, 658 cm, 3 mL), the complementary polyether ether ketone (PEEK) fittings, and the Upchurch Scientific's back pressure regulator (40 psi, 2.8 bar).

The prepared reactant solutions were pumped into the reactor by the Syrris Asia pump at the designated flow rate (600  $\mu\text{L}/\text{min}$ ). The reaction tube was immersed in an oil bath and heated at the designated temperature (110  $^{\circ}\text{C}$ ). The reaction was equilibrated for 15 minutes, which was three times longer than the residence time. After the equilibration, 6 mL of the solution was collected for 10 minutes. To the collected solution, was added 1,3,5-trimethoxybenzene (673 mg, 4 mmol, 1/3 eq of the collected reaction scale) as a standard compound. 0.1 mL of this solution was washed with 5%  $\text{NaHCO}_3$  aq (6 mL), extracted with EtOAc three times (6+6+6 mL), dried over  $\text{MgSO}_4$ , filtered, concentrated and analyzed by  $^1\text{H}$  NMR. The methoxy peak (3.77 ppm, 9H) or the aromatic peak (6.08 ppm, 3H) of 1,3,5-trimethoxybenzene was used as a reference. The methyl peak (3.24 ppm, 3H) of the target compound **10**<sup>1</sup> and the methyl peak (2.84 ppm, 3H) of *N*-methylaniline **9** were used to determine the NMR yields.

**Caution:**

The target compound **10** tends to be lost into the aqueous phase during the extraction process and *N*-methylaniline **9** can be evaporated during the concentration phase. These factors can affect the reproducibility of the experiments.

**Procedure for continuous reaction and work-up of step 1:**

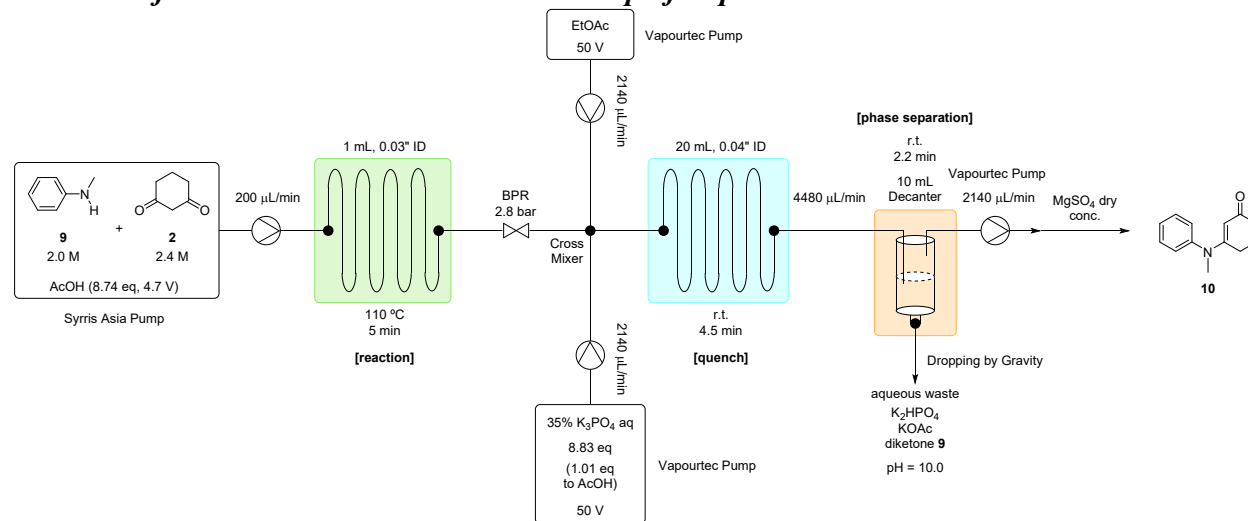

| time (hr) | NMR yield (%) <sup>a</sup> |           |
|-----------|----------------------------|-----------|
|           | <b>9</b>                   | <b>10</b> |
| 0         | 3.3                        | 94        |
| 1         | 3.0                        | 96        |
| 2         | 2.7                        | 97        |

|   |  |     |    |
|---|--|-----|----|
| 3 |  | 3.0 | 95 |
| 4 |  | 3.7 | 96 |
| 5 |  | 3.7 | 96 |
| 6 |  | 3.3 | 95 |
| 7 |  | 3.0 | 97 |

<sup>a</sup>The NMR yield was determined using 1,3,5-trimethoxybenzene as an internal standard.

*N*-Methylaniline **9** (21.67 mL, 200 mmol, 1 eq), 1,3-cyclohexanedione **2** (26.91 g, 240 mmol, 1.2 eq) were added to a 100 mL volumetric flask. AcOH was added to the 100 mL line of the volumetric flask.

The reactor was constructed from the fluorinated ethylene propylene (FEP) tubing (1/16'' outside diameter, 0.03'' inside diameter, 219 cm, 1 mL), the complementary polyether ether ketone (PEEK) fittings, and the Upchurch Scientific's back pressure regulator (40 psi, 2.8 bar).

The quenching and extraction tube was constructed from the perfluoroalkoxy (PFA) tubing (1/16'' outside diameter, 0.04'' inside diameter, 2467 cm, 20 mL), and the complementary polyether ether ketone (PEEK) fittings.

The decanter was constructed from the 10 mL glass syringe, the complementary polyether ether ketone (PEEK) fittings, and the rubber septa.

The prepared reactant solutions were pumped into the reactor by the Syrris Asia pump at the designated flow rate (200  $\mu$ L/min). The reaction tube was immersed in an oil bath and heated at the designated temperature (110 °C). 35% K<sub>3</sub>PO<sub>4</sub> aq and EtOAc were pumped into the quenching and extraction tube by the Vapourtec pumps at the designated flow rate (2.14 mL/min). The organic phase was pumped out of the decanter into the storage tank at the designated flow rate (2.14-2.19 mL/min). The system was equilibrated for 36 minutes, which was three times longer than the residence time. After the equilibration, 32.1 mL of the organic phase was collected for 15 minutes every hour. To each of the collected solution, was added 1,3,5-trimethoxybenzene (336.4 mg, 2 mmol, 1/3 eq of the collected reaction scale) as a standard compound. This solution was dried over MgSO<sub>4</sub>, filtered, concentrated and analyzed by <sup>1</sup>H NMR. The methoxy peak (3.77 ppm, 9 H) or the aromatic peak (6.08 ppm, 3 H) of 1,3,5-trimethoxybenzene was used as a reference. The methyl peak (3.24 ppm, 3H) of the target compound **10**<sup>1</sup> and the methyl peak (2.84 ppm, 3H) of *N*-methylaniline **9** were used to determine the NMR yields.

To the 674 mL of the organic phase which was collected for 315 minutes, was added MgSO<sub>4</sub> (6.7 g, 0.01 W). The mixture, which could contain 25.41 g of the target compound **10** theoretically, was filtered, washed with EtOAc and concentrated to 31.10 g. To the residue, was



added hexane (127 mL, 5 V). The solution was concentrated to 28.63 g. To the residue, was added hexane (127 mL, 5 V). The solution was concentrated to 30.51 g. To the residue, the seed crystal was added if necessary. To the solid, was added hexane (127 mL, 5 V). The slurry was stirred at 5 °C for 1 h. The slurry was filtered, washed with cold hexane (127 mL, 5 V), and air-dried overnight to afford the title compound **10**<sup>1</sup> (24.115 g, 94.9% yield, 97.62 pa%, yellow solid, MWL loss: 1.4%). <sup>1</sup>H NMR (500 MHz, CDCl<sub>3</sub>) δ: 7.41 (t, *J* = 7.7 Hz, 2H), 7.31 (t, *J* = 7.4 Hz, 1H), 7.15-7.11 (m, 2H), 5.32 (s, 1H), 3.24 (s, 3H), 2.31 (t, *J* = 6.5 Hz, 2H), 2.21 (t, *J* = 6.2 Hz, 2H), 1.89 (p, *J* = 6.3 Hz, 2H). <sup>13</sup>C NMR (125 MHz, CDCl<sub>3</sub>) δ: 197.7, 165.1, 145.5, 129.8 (2C), 127.6, 127.3 (2C), 100.7, 40.9, 36.3, 28.7, 22.7. IR (neat) *v*: 3042, 2938, 2891, 1610, 1556 cm<sup>-1</sup>. HRMS (DART) *m/z*: calcd for C<sub>13</sub>H<sub>16</sub>NO<sup>+</sup> [(M+H)<sup>+</sup>] 202.1226, found 202.1220.

**One of the <sup>1</sup>H NMR spectra to determine the NMR yields (after 3 hours):**

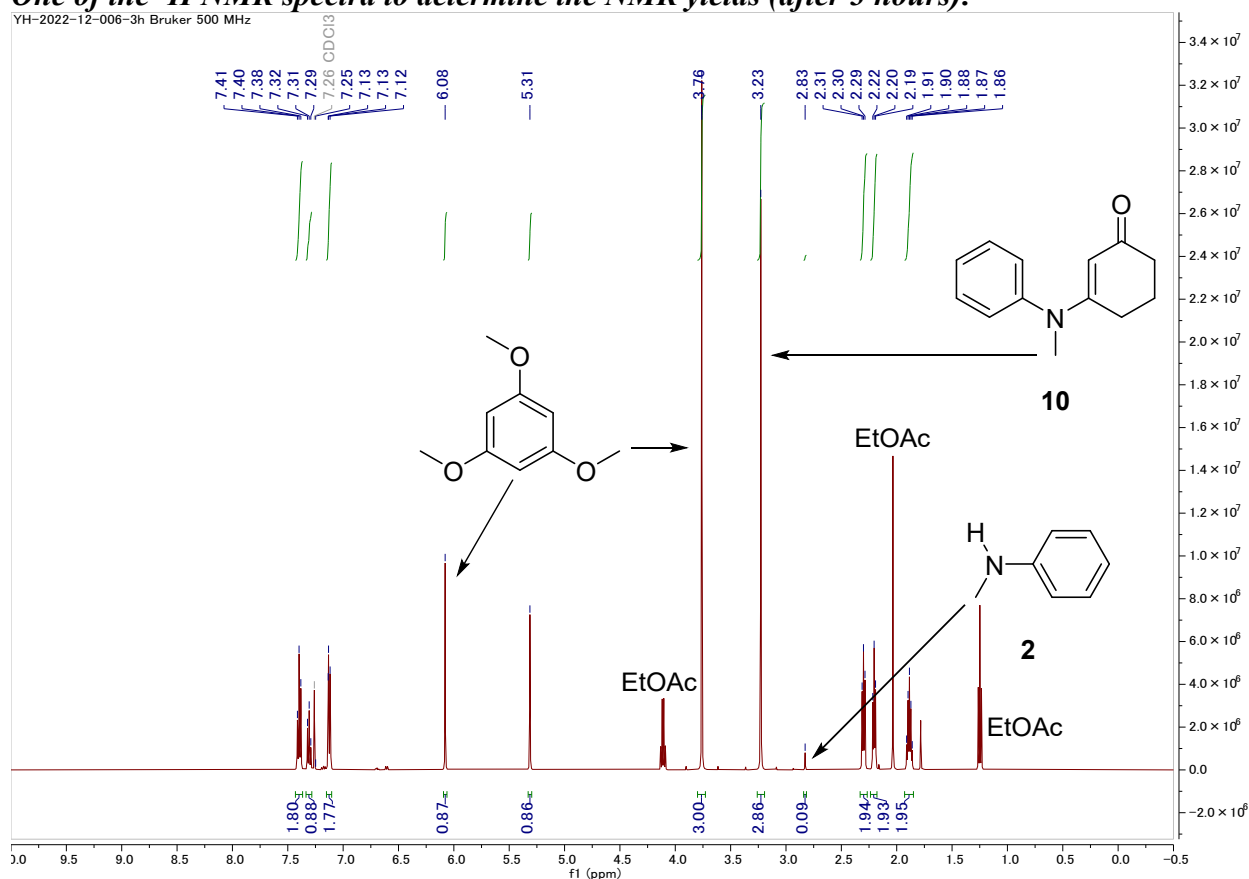

***<sup>1</sup>H NMR Spectrum of isolated 10:***

YH-2022-12-008-01 1H JEOL 500 MHz

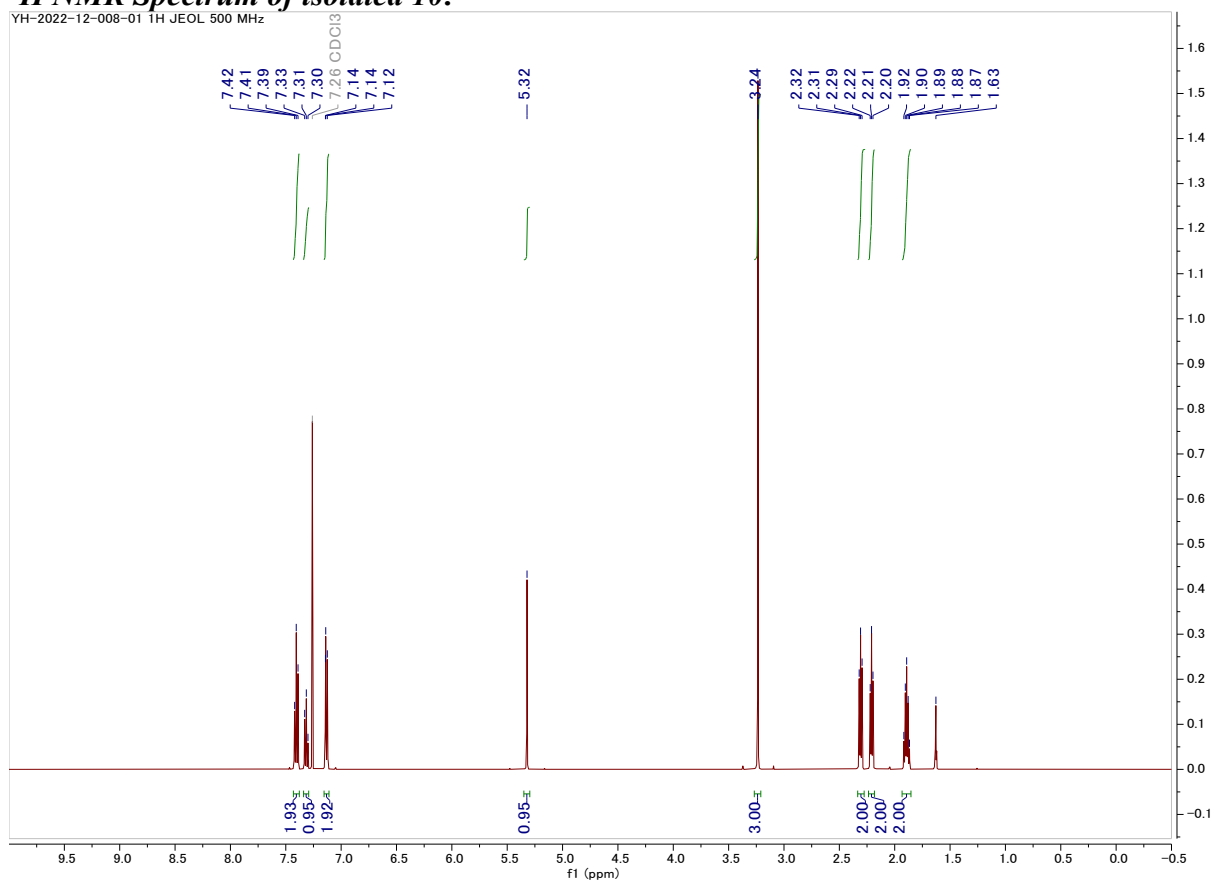

***<sup>13</sup>C NMR Spectrum of isolated 10:***

YH-2022-12-008-01 <sup>13</sup>C Bruker 125 MHz

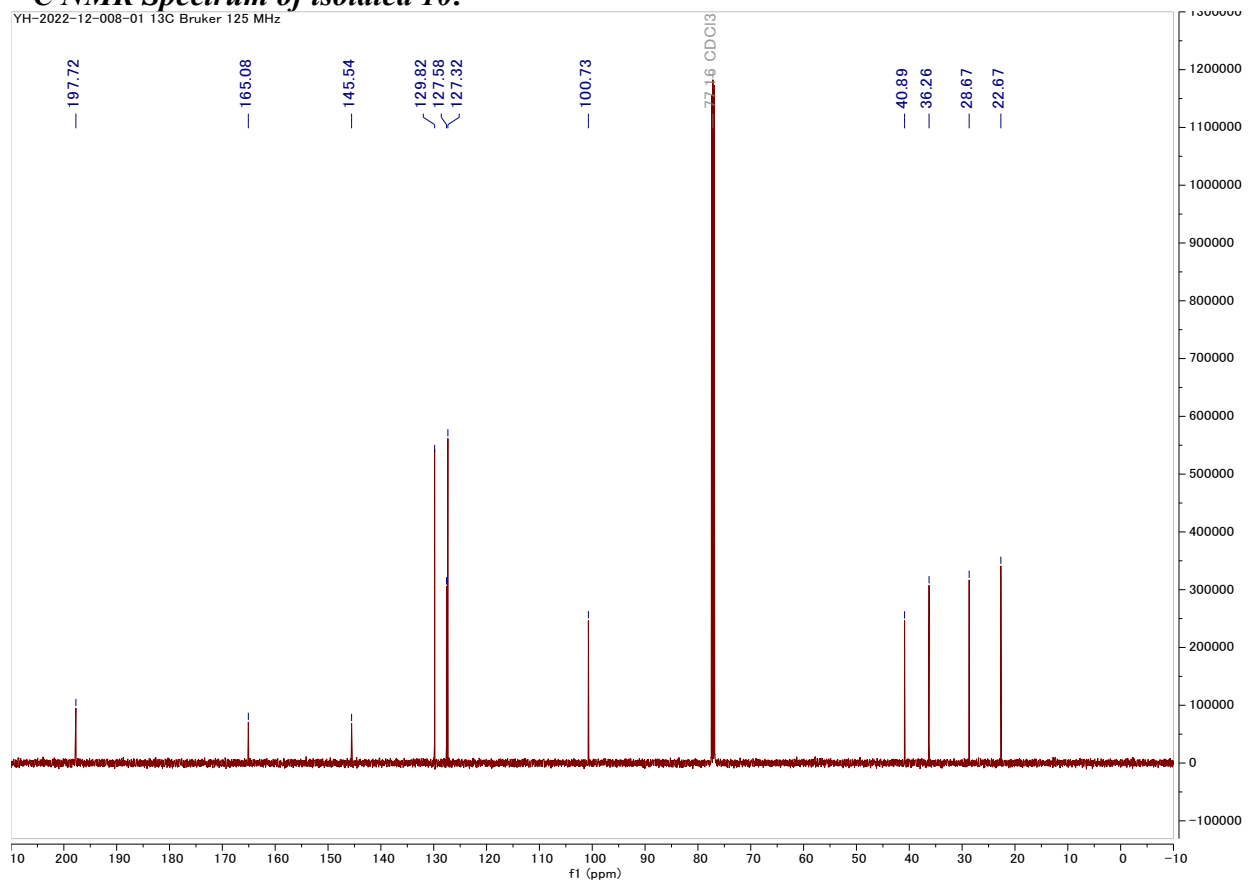

***HPLC data of isolated 10:***

MWD1 A, Sig=254,16 Ref=off (YH\YH\_20220624 2022-12-06 18-11-00\2022-12-06\_18-11-02.D)

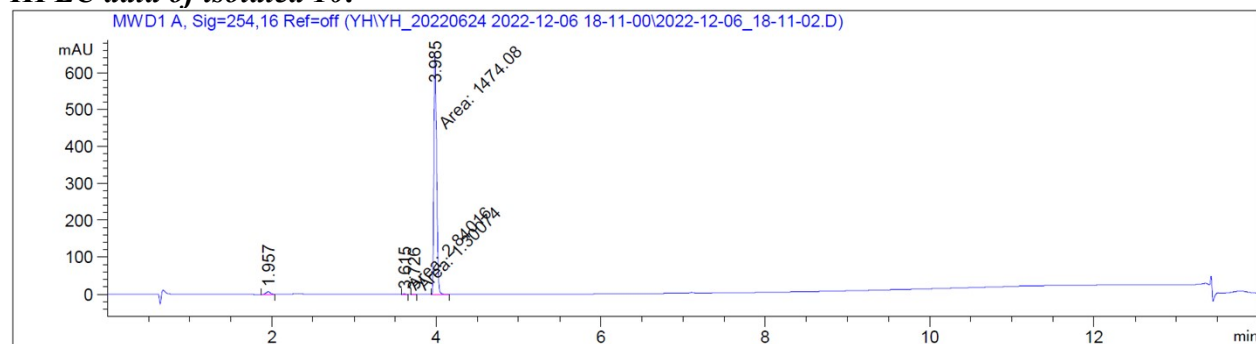

| Peak # | RetTime [min] | Type | Width [min] | Area [mAU*s] | Height [mAU] | Area %  |
|--------|---------------|------|-------------|--------------|--------------|---------|
| 1      | 1.957         | BV   | 0.0661      | 31.78567     | 7.54864      | 2.1050  |
| 2      | 3.615         | MM   | 0.0323      | 2.84016      | 1.46593      | 0.1881  |
| 3      | 3.726         | MM   | 0.0325      | 1.30074      | 6.67698e-1   | 0.0861  |
| 4      | 3.985         | MM   | 0.0374      | 1474.07886   | 657.73804    | 97.6208 |

**Photograph of the flow reactor for step 1:**

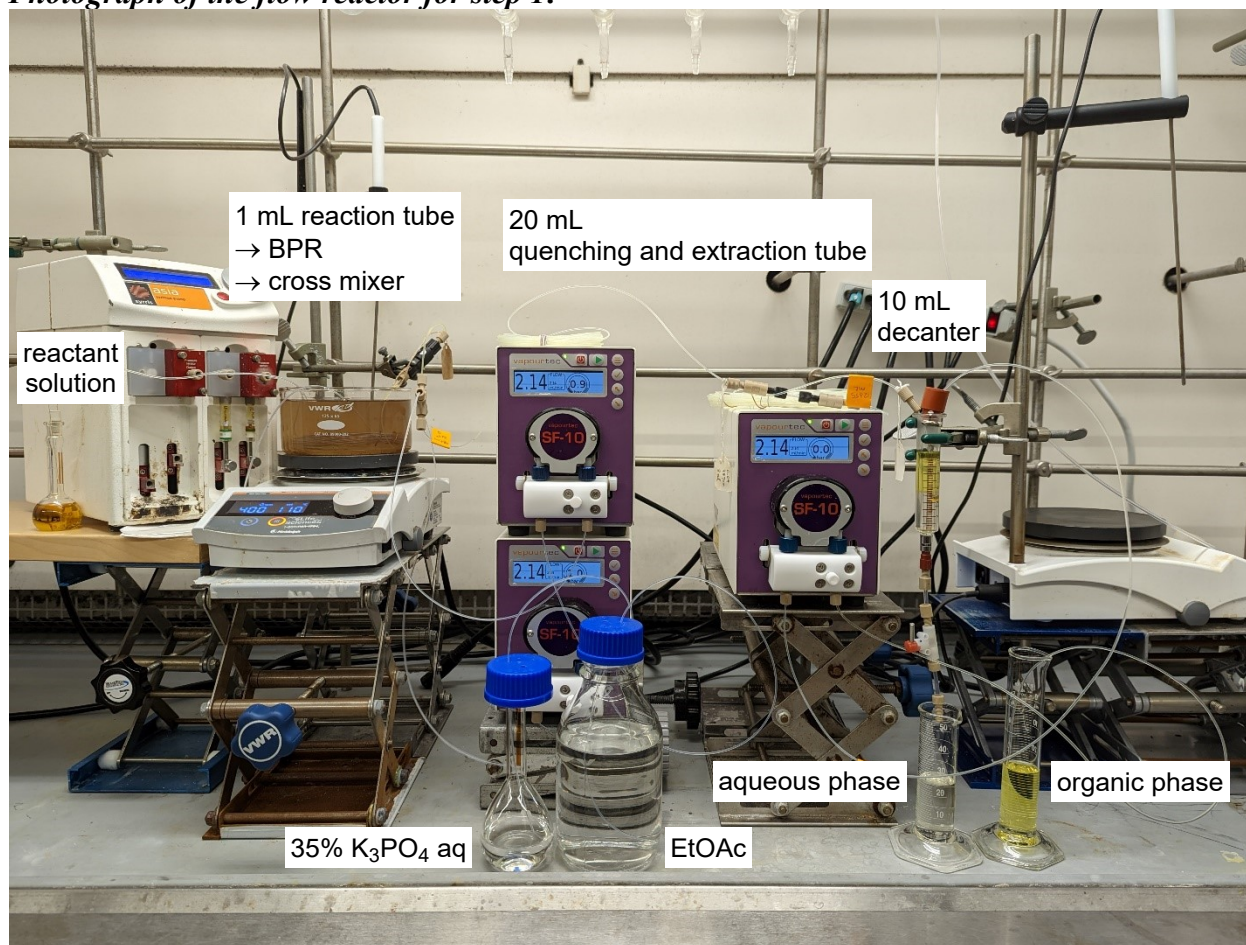

**Solubility of the substrate 5 and ondansetron 1:**

| Solvents | Solubility (Substrate 5)<br>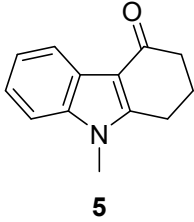<br>5 | Solubility (ondansetron 1)<br><br>1 |
|----------|----------------------------------------------------------------------------------------------------------------------|-------------------------------------------------------------------------------------------------------------------------|
| NMP      | 3.49 g/100 g NMP                                                                                                     | 2.29 g/100 g NMP                                                                                                        |
| DMF      | 2.46 g/100 g DMF                                                                                                     | 1.27 g/100 g DMF                                                                                                        |
| DMA      | 2.53 g/100 g DMA                                                                                                     | 1.22 g/100 g DMA                                                                                                        |

|                   |                                |                                |
|-------------------|--------------------------------|--------------------------------|
| DMSO              | 1.59 g/100 g DMSO              | 0.82 g/100 g DMSO              |
| THF               | 0.97 g/100 g THF               | 0.25 g/100 g THF               |
| MeCN              | 1.07 g/100 g MeCN              | 0.35 g/100 g MeCN              |
| MeOH              | 0.59 g/100 g MeOH              | 0.67 g/100 g MeOH              |
| IPA               | 0.23 g/100 g IPA               | 0.25 g/100 g IPA               |
| TFA               | >15.7 g/100 g TFA              | >18.7 g/100 g TFA              |
| AcOH              | 3.73 g/100 g AcOH              | >27.3 g/100 g AcOH             |
| Ac <sub>2</sub> O | 0.57 g/100 g Ac <sub>2</sub> O | Swelled, could not be filtered |
| Toluene           | 0.37 g/100 g Toluene           | 0.023 g/100 g Toluene          |
| DCE               | 2.65 g/100 g DCE               | 0.53 g/100 g DCE               |

**Procedure of the batch one-pot condition invented by Hesoun and Hykl<sup>2</sup> for step 3 and 4:**

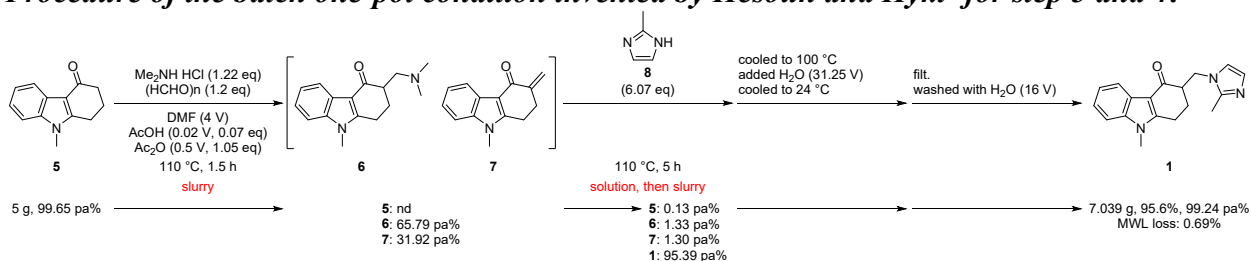

To a 300 mL round bottomed flask, were added the substrate **5** (5.00 g, 25.09 mmol, 1 eq), dimethylamine hydrochloride (2.50 g, 30.61 mmol, 1.22 eq), paraformaldehyde (904 mg, 30.11 mmol, 1.20 eq), DMF (20 mL, 4 V), AcOH (0.1 mL, 1.76 mmol, 0.07 eq), and Ac<sub>2</sub>O (2.49 mL, 26.35 mmol, 1.05 eq, 0.5 V) in this order. The reaction mixture was warmed to 110 °C and stirred at 110 °C for 1.5 hours. To the reaction mixture, was added 2-methylimidazole **8** (12.51 g, 152.32 mmol, 6.07 eq). The reaction mixture was stirred at 110 °C for 5 hours. The reaction mixture was cooled to 100 °C. To the mixture, was added H<sub>2</sub>O (156.25 mL, 31.25 V) over 10 minutes. The reaction mixture was cooled to r.t., filtered and washed with H<sub>2</sub>O (80 mL, 16 V).

The solid was air-dried overnight to give ondansetron **1**<sup>3</sup> (7.039 g, 95.6% yield, 99.24 pa%, off-white solid, MWL loss: 0.69%).

**HPLC data at the end point of step 3:**

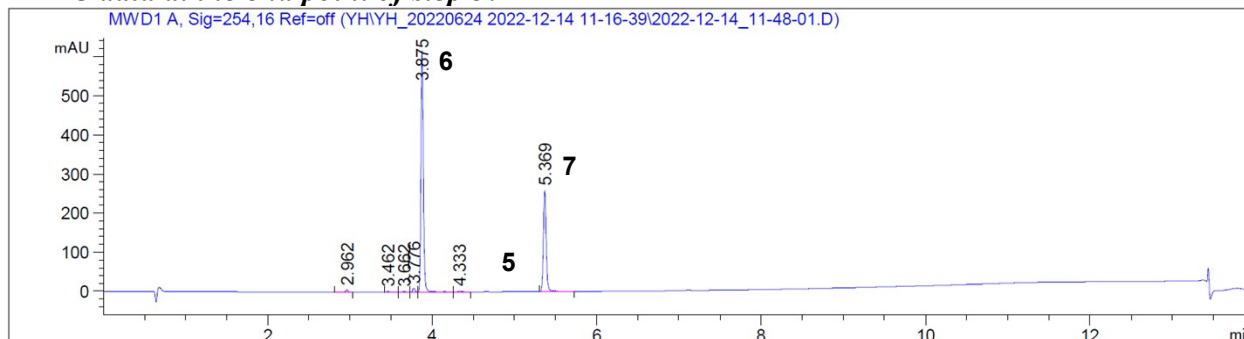

| Peak # | RetTime [min] | Type | Width [min] | Area [mAU*s] | Height [mAU] | Area %  |
|--------|---------------|------|-------------|--------------|--------------|---------|
| 1      | 2.962         | VB R | 0.0288      | 11.49214     | 6.14242      | 0.5784  |
| 2      | 3.462         | BV R | 0.0298      | 3.72970      | 1.91132      | 0.1877  |
| 3      | 3.662         | BB   | 0.0286      | 4.10604      | 2.21425      | 0.2066  |
| 4      | 3.776         | BB   | 0.0282      | 18.57401     | 10.23405     | 0.9348  |
| 5      | 3.875         | BV R | 0.0327      | 1307.26282   | 616.86481    | 65.7910 |
| 6      | 4.333         | BB   | 0.0372      | 7.50775      | 2.90043      | 0.3778  |
| 7      | 5.369         | BV R | 0.0376      | 634.32092    | 258.69705    | 31.9237 |

**HPLC data at the end point of step 4:**

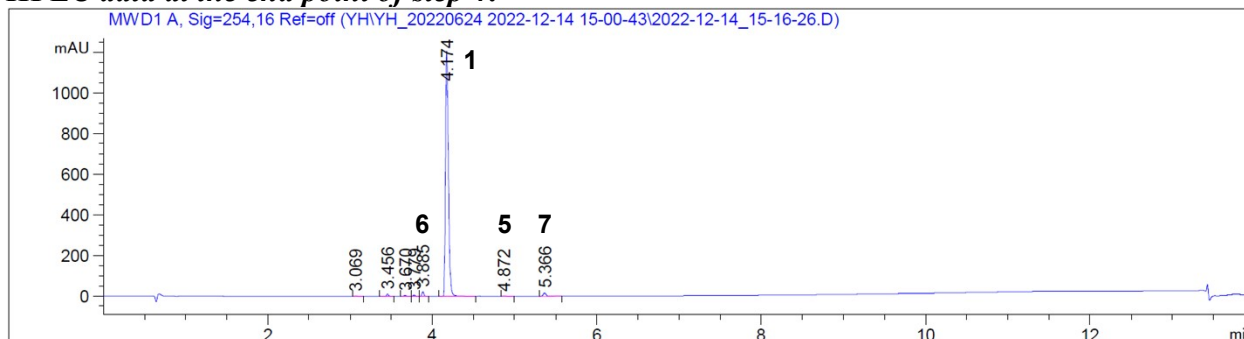

| Peak # | RetTime [min] | Type | Width [min] | Area [mAU*s] | Height [mAU] | Area %  |
|--------|---------------|------|-------------|--------------|--------------|---------|
| 1      | 3.069         | BV R | 0.0289      | 7.96623      | 4.24664      | 0.2510  |
| 2      | 3.456         | VB R | 0.0286      | 23.74027     | 12.79580     | 0.7481  |
| 3      | 3.670         | BV R | 0.0347      | 13.94607     | 6.32046      | 0.4395  |
| 4      | 3.779         | VB   | 0.0302      | 13.11312     | 6.89114      | 0.4132  |
| 5      | 3.885         | BB   | 0.0300      | 42.05742     | 22.30237     | 1.3253  |
| 6      | 4.174         | BV R | 0.0392      | 3027.14038   | 1208.54138   | 95.3900 |
| 7      | 4.872         | VB   | 0.0351      | 4.15706      | 1.78651      | 0.1310  |
| 8      | 5.366         | BV R | 0.0390      | 41.31509     | 16.61780     | 1.3019  |

**HPLC data of isolated ondansetron 1:**

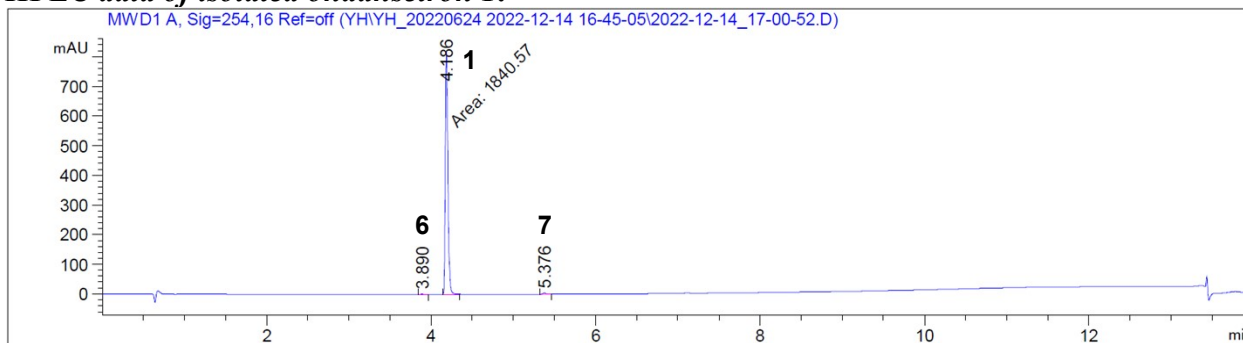

| Peak # | RetTime [min] | Type | Width [min] | Area [mAU*s] | Height [mAU] | Area %  |
|--------|---------------|------|-------------|--------------|--------------|---------|
| 1      | 3.890         | VB   | 0.0293      | 3.83831      | 2.00381      | 0.2070  |
| 2      | 4.186         | MM   | 0.0373      | 1840.56738   | 822.49377    | 99.2390 |
| 3      | 5.376         | BB   | 0.0374      | 10.27658     | 4.21708      | 0.5541  |

### <sup>1</sup>H NMR Spectrum of isolated ondansetron 1:

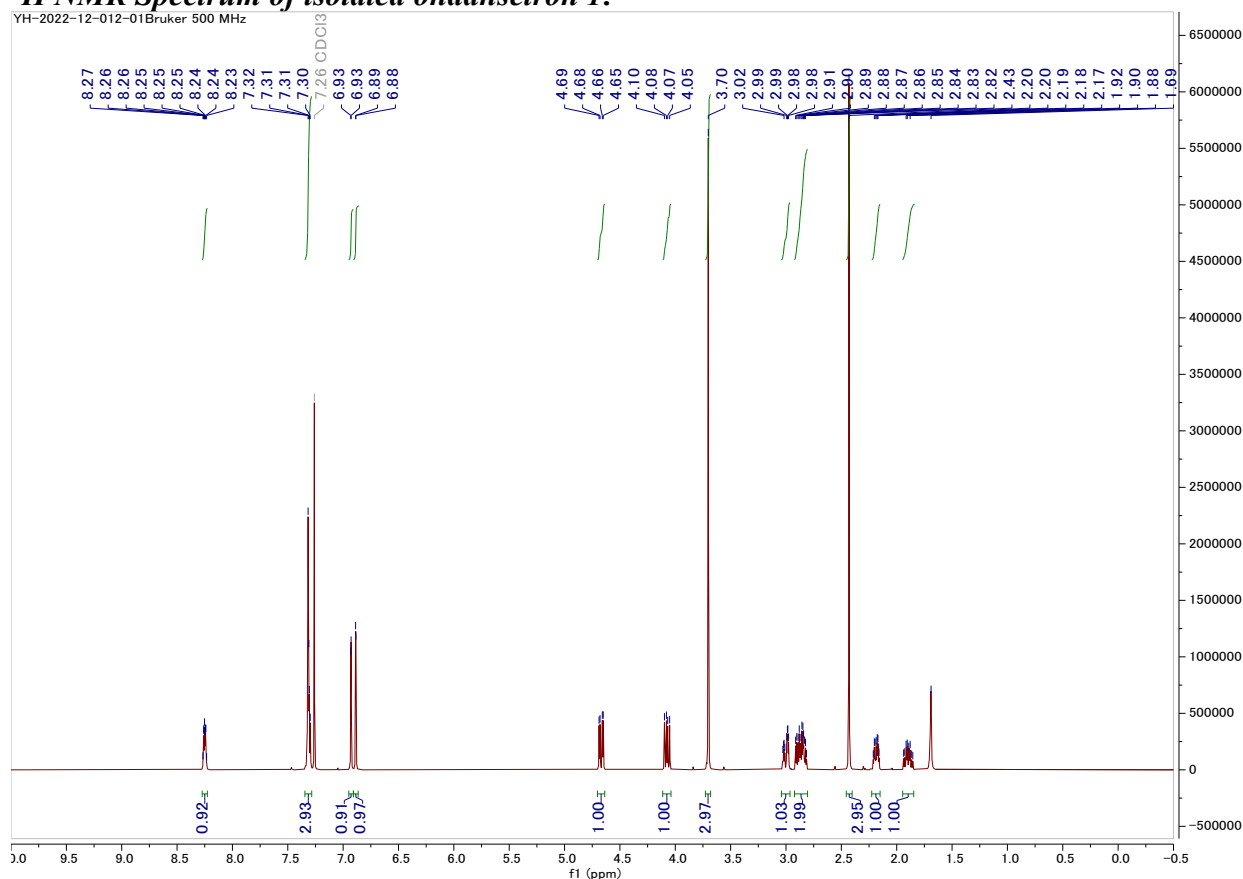

### Procedure of the batch homogeneous condition for step 3 and 4:

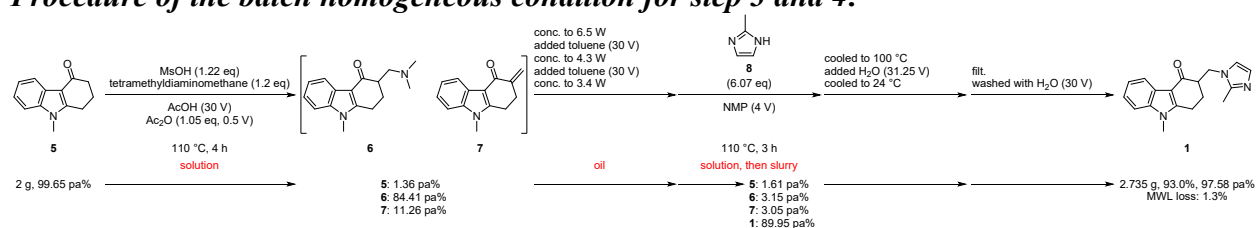

To a 250 mL round bottomed flask, were added the substrate **5** (2.00 g, 10.04 mmol, 1 eq), and AcOH (60 mL, 30 V). The mixture was stirred at 24 °C for 10 minutes to make a homogeneous solution. To the solution, were added *N,N,N,N*-tetramethyldiaminomethane (1.64 mL, 12.04 mmol, 1.20 eq), MsOH (0.80 mL, 12.25 mmol, 1.22 eq), Ac<sub>2</sub>O (1.00 mL, 10.54 mmol, 1.05 eq, 0.5 V) in this order. The reaction mixture was warmed to 110 °C and stirred at 110 °C for 4 hours. The reaction mixture was concentrated to 13.06 g, 6.53 W. To the residue, was added toluene (60 mL, 30 V). The reaction mixture was concentrated to 8.51 g, 4.26 W. To the residue, was added toluene (60 mL, 30 V). The reaction mixture was concentrated to 6.82 g, 3.41 W. To the residue, were added NMP (8 mL, 4 V) and 2-methylimidazole **8** (5.00 g, 60.93 mmol, 6.07 eq). The reaction mixture was warmed to 110 °C and stirred at 110 °C for 3 hours. The reaction mixture was cooled to 100 °C. To the mixture, was added H<sub>2</sub>O (62.5 mL, 31.25 V) over 10 minutes. The reaction mixture was cooled to r.t., filtered and washed with H<sub>2</sub>O (60 mL, 30 V).



The solid was air-dried overnight to give ondansetron **1**<sup>3</sup> (2.735 g, 93.0% yield, 97.58 pa%, off-white solid, MWL loss: 1.3%).

**HPLC data at the end point of step 3:**

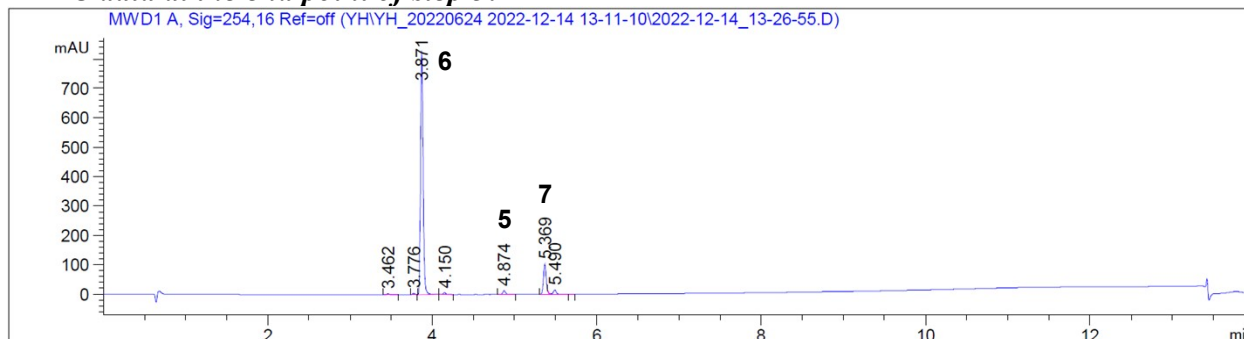

| Peak # | RetTime [min] | Type | Width [min] | Area [mAU*s] | Height [mAU] | Area %  |
|--------|---------------|------|-------------|--------------|--------------|---------|
| 1      | 3.462         | BB   | 0.0306      | 6.52084      | 3.36321      | 0.2987  |
| 2      | 3.776         | BB   | 0.0270      | 7.09429      | 4.14243      | 0.3250  |
| 3      | 3.871         | BV R | 0.0349      | 1842.68030   | 829.82214    | 84.4108 |
| 4      | 4.150         | BV R | 0.0334      | 14.16360     | 6.51818      | 0.6488  |
| 5      | 4.874         | BB   | 0.0360      | 29.62728     | 12.82197     | 1.3572  |
| 6      | 5.369         | BV R | 0.0371      | 245.73027    | 102.13350    | 11.2566 |
| 7      | 5.490         | VV E | 0.0395      | 37.17379     | 14.19628     | 1.7029  |

**HPLC data at the end point of step 4:**

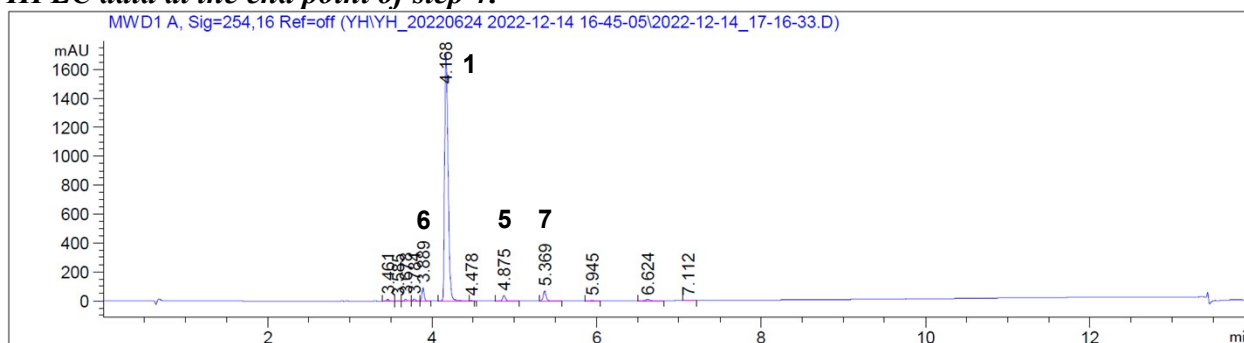

| Peak # | RetTime [min] | Type | Width [min] | Area [mAU*s] | Height [mAU] | Area %  |
|--------|---------------|------|-------------|--------------|--------------|---------|
| 1      | 3.461         | VB R | 0.0292      | 22.53184     | 11.83943     | 0.4085  |
| 2      | 3.585         | BB   | 0.0276      | 5.59639      | 3.16837      | 0.1015  |
| 3      | 3.678         | BV R | 0.0312      | 26.40295     | 13.25941     | 0.4786  |
| 4      | 3.784         | BV R | 0.0308      | 26.03684     | 12.73682     | 0.4720  |
| 5      | 3.889         | VB   | 0.0291      | 173.73604    | 91.58176     | 3.1495  |
| 6      | 4.168         | BV R | 0.0457      | 4961.88086   | 1717.10291   | 89.9485 |
| 7      | 4.478         | VB E | 0.0292      | 4.46658      | 2.34788      | 0.0810  |
| 8      | 4.875         | VV R | 0.0361      | 88.95988     | 38.29840     | 1.6127  |
| Peak # | RetTime [min] | Type | Width [min] | Area [mAU*s] | Height [mAU] | Area %  |
| 9      | 5.369         | BV R | 0.0377      | 168.11240    | 68.34435     | 3.0475  |
| 10     | 5.945         | BB   | 0.0364      | 6.83746      | 2.80639      | 0.1239  |
| 11     | 6.624         | BV R | 0.0542      | 24.07673     | 6.82257      | 0.4365  |
| 12     | 7.112         | BB   | 0.0500      | 7.72209      | 2.37225      | 0.1400  |

**HPLC data of isolated ondansetron 1:**

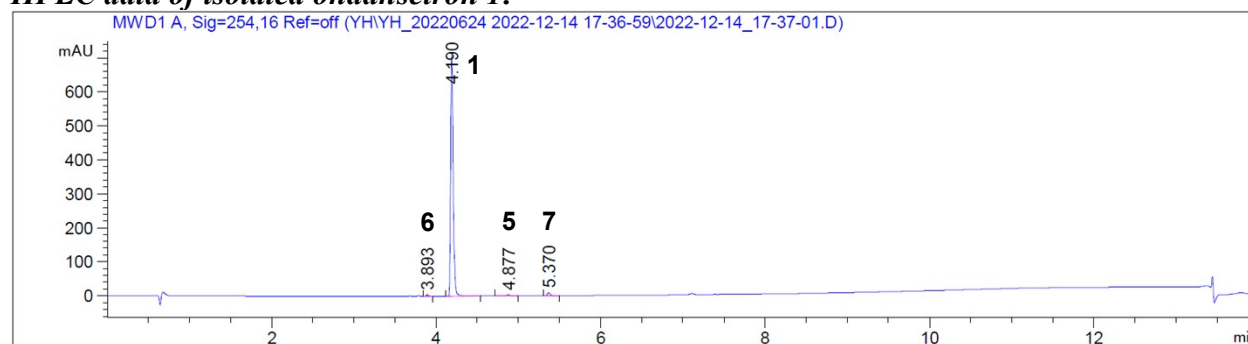

| Peak # | RetTime [min] | Type | Width [min] | Area [mAU*s] | Height [mAU] | Area %  |
|--------|---------------|------|-------------|--------------|--------------|---------|
| 1      | 3.893         | BB   | 0.0291      | 7.58967      | 4.00155      | 0.4739  |
| 2      | 4.190         | BV R | 0.0336      | 1562.67224   | 713.10742    | 97.5747 |
| 3      | 4.877         | VB R | 0.0399      | 9.09338      | 3.43326      | 0.5678  |
| 4      | 5.370         | BB   | 0.0379      | 22.15879     | 8.95494      | 1.3836  |

### <sup>1</sup>H NMR Spectrum of isolated ondansetron 1:

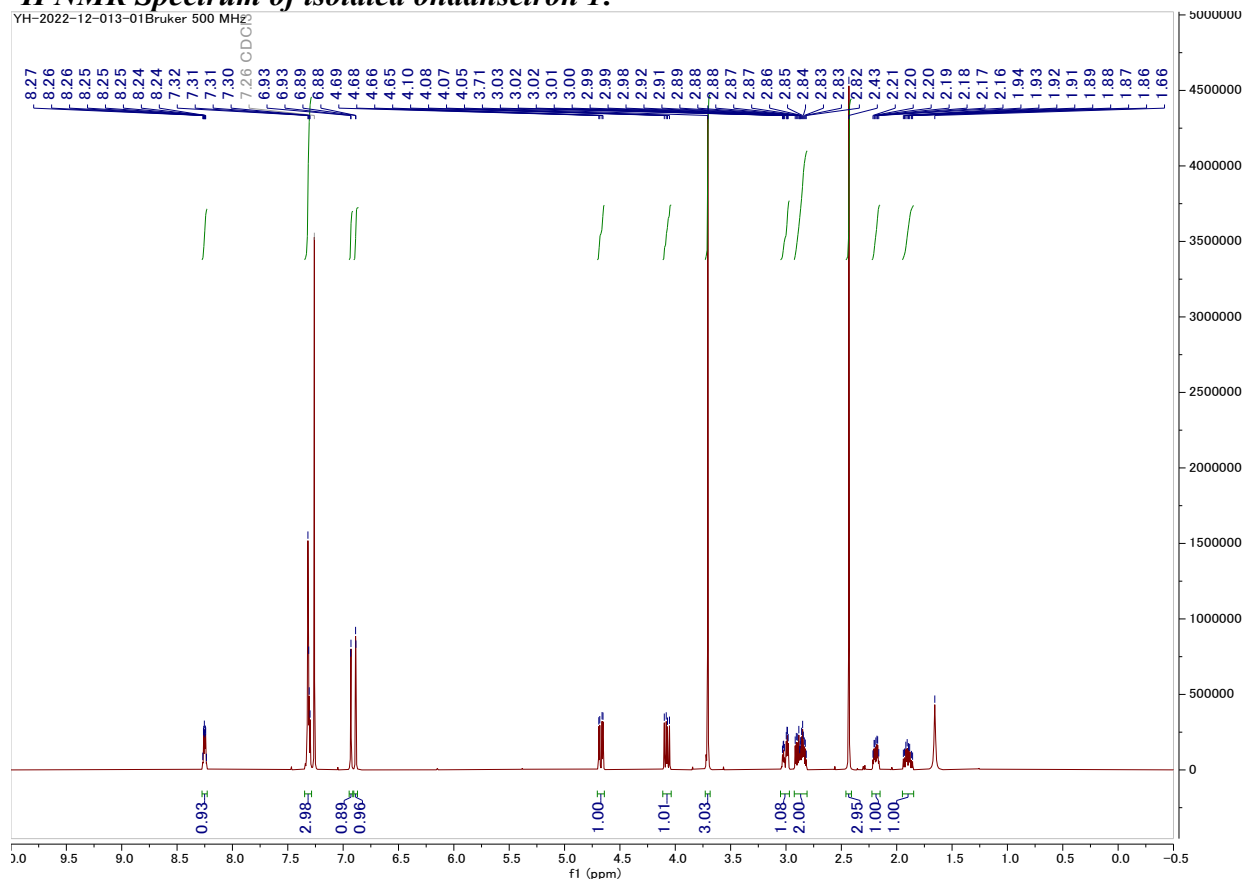

### Procedure of the batch homogeneous condition without the solvent switch for step 3 and 4:

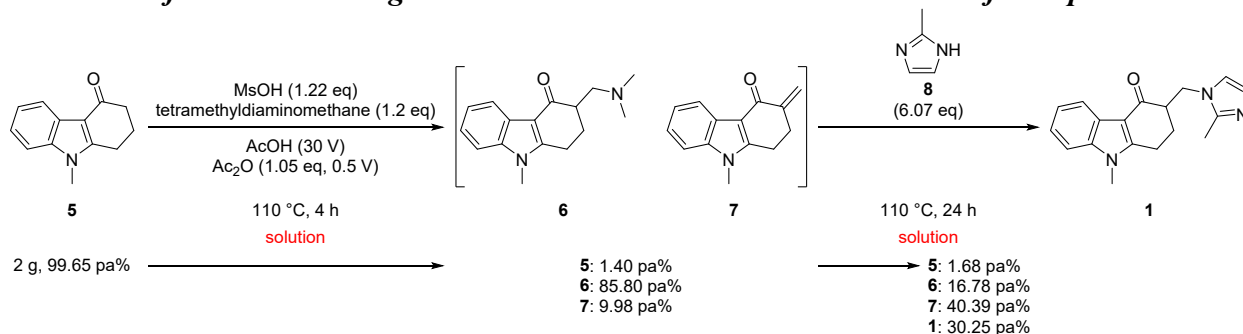

To a 250 mL round bottomed flask, were added the substrate **5** (2.00 g, 10.04 mmol, 1 eq), and AcOH (60 mL, 30 V). The mixture was stirred at 24 °C for 10 minutes to make a homogeneous solution. To the solution, were added *N,N,N,N*-tetramethyldiaminomethane (1.64 mL, 12.04 mmol, 1.20 eq), MsOH (0.80 mL, 12.25 mmol, 1.22 eq), Ac<sub>2</sub>O (1.00 mL, 10.54 mmol, 1.05 eq, 0.5 V) in this order. The reaction mixture was warmed to 110 °C and stirred at 110 °C for 4 hours. To the reaction mixture, was added 2-methylimidazole **8** (5.00 g, 60.93 mmol, 6.07 eq). The reaction mixture was stirred at 110 °C for 24 hours.

**HPLC data at the end point of step 3:**

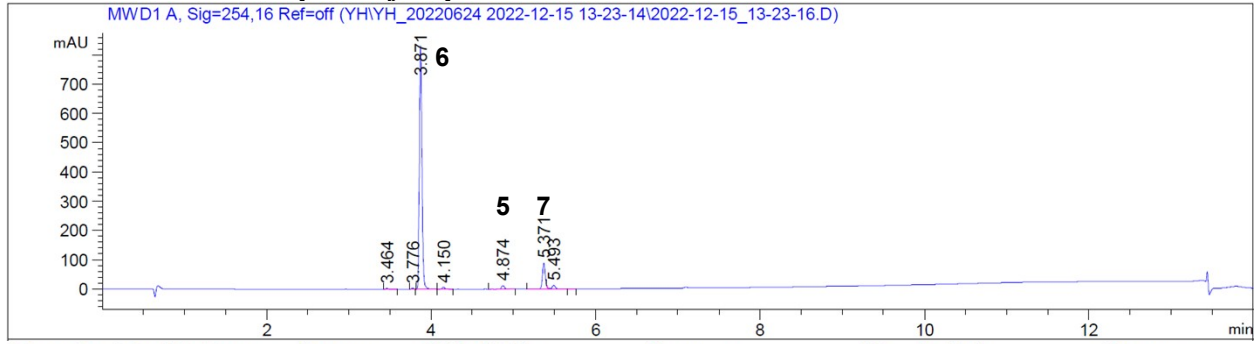

| Peak # | RetTime [min] | Type | Width [min] | Area [mAU*s] | Height [mAU] | Area %  |
|--------|---------------|------|-------------|--------------|--------------|---------|
| 1      | 3.464         | BB   | 0.0294      | 6.42071      | 3.34815      | 0.2971  |
| 2      | 3.776         | BB   | 0.0269      | 6.34129      | 3.71639      | 0.2934  |
| 3      | 3.871         | BV R | 0.0339      | 1854.40637   | 834.02509    | 85.7972 |
| 4      | 4.150         | VB   | 0.0341      | 15.55631     | 6.70434      | 0.7197  |
| 5      | 4.874         | VV R | 0.0371      | 30.29416     | 12.55980     | 1.4016  |
| 6      | 5.371         | BV R | 0.0381      | 215.79150    | 89.52969     | 9.9840  |
| 7      | 5.493         | VV E | 0.0400      | 32.57296     | 12.27128     | 1.5070  |

**HPLC data at the end point of step 4:**

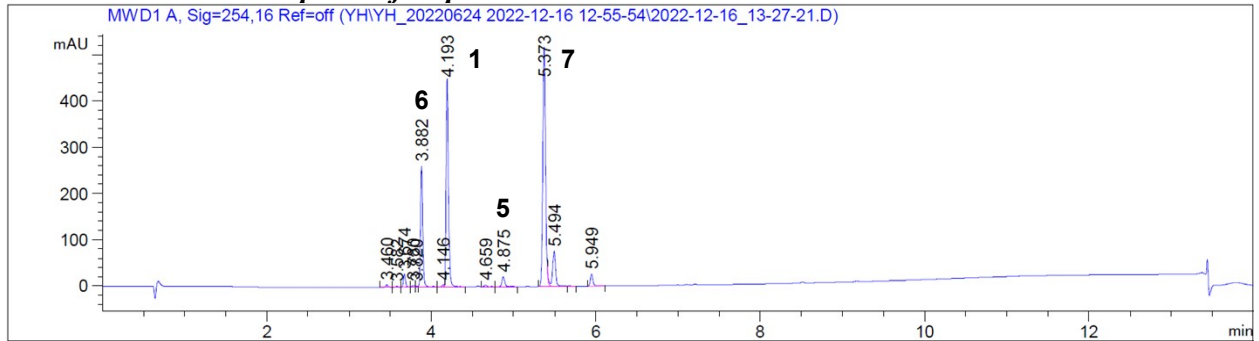

| Peak # | RetTime [min] | Type | Width [min] | Area [mAU*s] | Height [mAU] | Area %  |
|--------|---------------|------|-------------|--------------|--------------|---------|
| 1      | 3.460         | VB R | 0.0282      | 9.51389      | 5.23200      | 0.3099  |
| 2      | 3.582         | BB   | 0.0277      | 3.31533      | 1.86562      | 0.1080  |
| 3      | 3.674         | BB   | 0.0276      | 49.48617     | 28.01710     | 1.6119  |
| 4      | 3.780         | BV E | 0.0315      | 6.40532      | 3.17712      | 0.2086  |
| 5      | 3.820         | VV E | 0.0258      | 3.18498      | 1.87234      | 0.1037  |
| 6      | 3.882         | VV R | 0.0310      | 515.16412    | 261.74942    | 16.7805 |
| 7      | 4.146         | BV E | 0.0231      | 6.26398      | 4.26238      | 0.2040  |
| 8      | 4.193         | VV R | 0.0320      | 928.65729    | 450.82239    | 30.2493 |

  

| Peak # | RetTime [min] | Type | Width [min] | Area [mAU*s] | Height [mAU] | Area %  |
|--------|---------------|------|-------------|--------------|--------------|---------|
| 9      | 4.659         | VV R | 0.0374      | 8.16894      | 3.23970      | 0.2661  |
| 10     | 4.875         | VV R | 0.0357      | 51.64676     | 21.76896     | 1.6823  |
| 11     | 5.373         | BV R | 0.0369      | 1238.37024   | 518.41809    | 40.3377 |
| 12     | 5.494         | VV E | 0.0388      | 192.76735    | 75.56142     | 6.2791  |
| 13     | 5.949         | BB   | 0.0336      | 57.06334     | 25.96767     | 1.8587  |

**Reaction condition screening of step 3:**

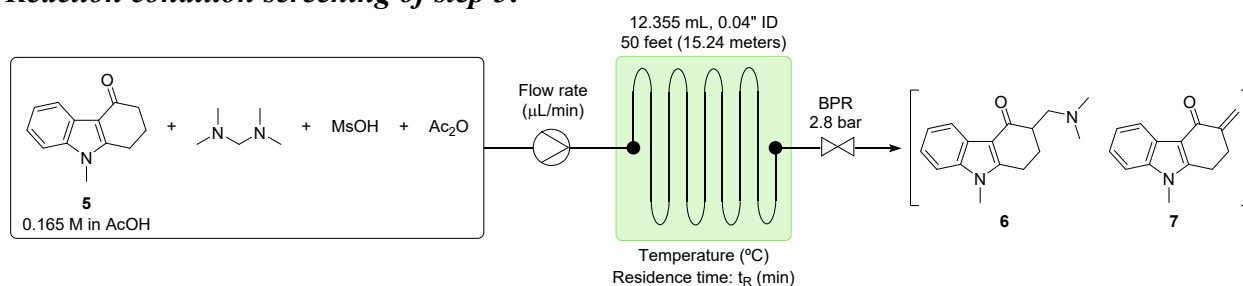

| entry | reaction parameter                               |               |                         |                       | HPLC (pa%) |       |       |       |
|-------|--------------------------------------------------|---------------|-------------------------|-----------------------|------------|-------|-------|-------|
|       | equivalent<br>[diamine, MsOH, Ac <sub>2</sub> O] | temp.<br>(°C) | t <sub>R</sub><br>(min) | flow rate<br>(μL/min) | 5          | 6     | 7     | 5+6+7 |
| 1     | 1.20, 1.22, 1.05                                 | 110           | 60                      | 206                   | 8.10       | 84.31 | 6.09  | 98.50 |
| 2     | 1.20, 1.22, 1.05                                 | 120           | 60                      | 206                   | 2.08       | 73.93 | 19.45 | 95.46 |

|    |                  |     |    |     |      |       |       |       |
|----|------------------|-----|----|-----|------|-------|-------|-------|
| 3  | 1.20, 1.22, 1.05 | 120 | 45 | 275 | 4.01 | 80.67 | 12.55 | 97.23 |
| 4  | 1.20, 1.22, 1.05 | 130 | 45 | 275 | 1.23 | 56.50 | 34.35 | 92.08 |
| 5  | 1.20, 1.22, 1.05 | 130 | 30 | 412 | 3.23 | 69.99 | 21.84 | 95.06 |
| 6  | 1.20, 1.22, 1.05 | 130 | 25 | 494 | 4.17 | 73.61 | 18.68 | 96.46 |
| 7  | 1.20, 1.22, 1.05 | 130 | 20 | 618 | 7.78 | 74.85 | 14.13 | 96.76 |
| 8  | 1.20, 1.22, 0    | 120 | 45 | 275 | 3.82 | 74.44 | 17.76 | 96.02 |
| 9  | 1.20, 1.22, 2.10 | 120 | 45 | 275 | 3.83 | 84.46 | 8.90  | 97.19 |
| 10 | 1.20, 1.22, 3.15 | 120 | 45 | 275 | 4.77 | 83.43 | 8.50  | 96.70 |
| 11 | 1.20, 1.22, 0    | 130 | 25 | 494 | 5.10 | 67.90 | 22.96 | 95.96 |
| 12 | 1.20, 1.22, 2.10 | 130 | 25 | 494 | 4.19 | 79.56 | 13.18 | 96.93 |
| 13 | 1.20, 1.22, 3.15 | 130 | 25 | 494 | 5.85 | 77.53 | 12.88 | 96.26 |
| 14 | 1.20, 1.22, 0    | 130 | 30 | 412 | 2.85 | 62.02 | 29.40 | 94.27 |
| 15 | 1.20, 1.22, 2.10 | 130 | 30 | 412 | 2.18 | 77.88 | 15.16 | 95.22 |
| 16 | 1.20, 1.22, 3.15 | 130 | 30 | 412 | 5.46 | 74.47 | 15.07 | 95.00 |

***Procedure for entries 1-16:***

The substrate **5** (1.64 g, 8.25 mmol, 1 eq), *N,N,N,N*-tetramethyldiaminomethane (1.35 mL, 9.90 mmol, 1.2 eq), MsOH (0.65 mL, 10.07 mmol, 1.22 eq) and Ac<sub>2</sub>O (0 mL, 0 mmol, 0 eq, or 0.82 mL, 8.66 mmol, 1.05 eq, or 1.64 mL, 17.32 mmol, 2.10 eq, or 2.46 mL, 25.99 mmol, 3.15 eq) were added to a 50 mL volumetric flask. AcOH was added to the 50 mL line of the volumetric flask.

The reactor was constructed from the perfluoroalkoxy (PFA) tubing (1/16'' outside diameter, 0.04'' inside diameter, 15.24 m (= 50 feet), 12.355 mL), the complementary polyether ether ketone (PEEK) fittings, and the Upchurch Scientific's back pressure regulator (40 psi, 2.8 bar).

The prepared reactant solutions were pumped into the reactor by the Syrris Asia pump at the designated flow rate (206, 275, 412, 494 or 618  $\mu$ L/min). The reaction tube was immersed in an oil bath and heated at the designated temperature (110, 120 or 130 °C). The reaction was equilibrated for 60, 75, 90, 135 or 180 minutes, which was three times longer than the residence time. After the equilibration, 6.18 mL of the solution was collected for 10, 12.5, 15, 22.5 or 30

minutes, depending on the flow rate. The collected solution was analyzed by HPLC to determine the conversion.

**Procedure for the extended-time experiment of step 3:**

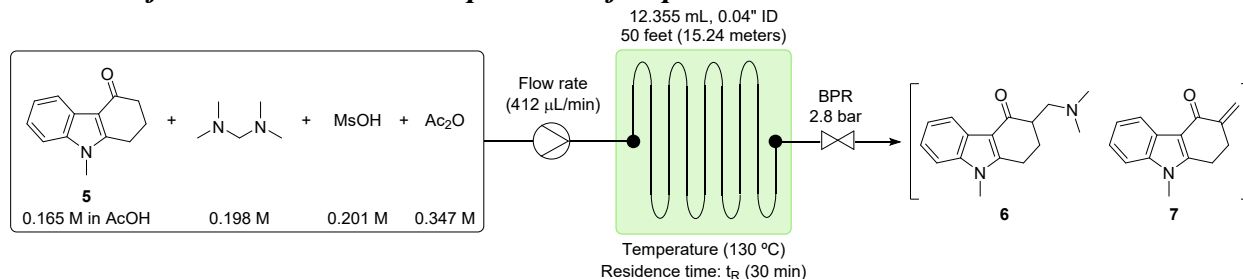

| time (hr)              | HPLC (pa%)        |  | HPLC (pa%)       |       |       |       |
|------------------------|-------------------|--|------------------|-------|-------|-------|
|                        | reactant solution |  | reacted solution |       |       |       |
|                        | 5                 |  | 5                | 6     | 7     | 5+6+7 |
| -1.5                   | 99.59             |  | -                | -     | -     | -     |
| 0                      | 99.45             |  | 3.61             | 76.87 | 15.47 | 95.95 |
| 1                      | 99.18             |  | 3.47             | 77.18 | 15.29 | 95.94 |
| 2                      | 99.11             |  | 3.50             | 76.80 | 15.55 | 95.85 |
| 3                      | 99.12             |  | 3.46             | 76.84 | 15.56 | 95.86 |
| 4                      | 99.09             |  | 3.37             | 77.17 | 15.31 | 95.85 |
| 5                      | 98.99             |  | 3.38             | 76.93 | 15.52 | 95.83 |
| 6                      | 99.00             |  | 3.37             | 77.16 | 15.50 | 96.03 |
| 7                      | 99.02             |  | 3.38             | 77.22 | 15.20 | 95.80 |
| all collected solution | -                 |  | 3.45             | 76.95 | 15.46 | 95.86 |

The substrate **5** (8.22 g, 41.25 mmol, 1 eq), *N,N,N,N*-tetramethyldiaminomethane (6.75 mL, 49.50 mmol, 1.2 eq), MsOH (3.27 mL, 50.33 mmol, 1.22 eq) and Ac<sub>2</sub>O (8.19 mL, 86.62 mmol, 2.10 eq) were added to a 250 mL volumetric flask. AcOH was added to the 250 mL line of the volumetric flask.

The reactor was constructed from the perfluoroalkoxy (PFA) tubing (1/16'' outside diameter, 0.04'' inside diameter, 15.24 m (= 50 feet), 12.355 mL), the complementary polyether ether ketone (PEEK) fittings, and the Upchurch Scientific's back pressure regulator (40 psi, 2.8 bar).

The prepared reactant solutions were pumped into the reactor by the Syrris Asia pump at the designated flow rate (412  $\mu\text{L}/\text{min}$ ). The reaction tube was immersed in an oil bath and heated at the designated temperature (130  $^{\circ}\text{C}$ ). The reaction was equilibrated for 90 minutes, which was three times longer than the residence time. After the equilibration, 173.04 mL of the solution was collected for 420 minutes. The collected solution was analyzed by HPLC to determine the conversion, stored at 0  $^{\circ}\text{C}$  and used in the next step.

**HPLC data of the all collected reaction solution of step 3:**

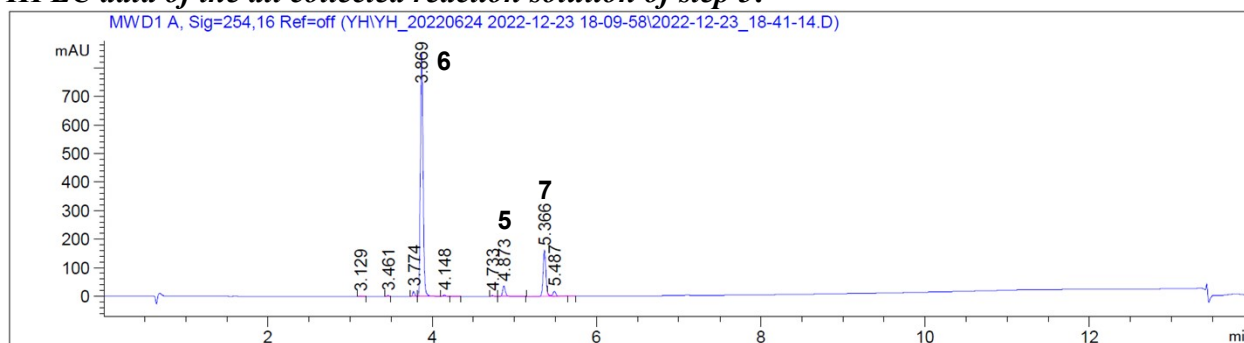

| Peak # | RetTime [min] | Type | Width [min] | Area [mAU*s] | Height [mAU] | Area %  |
|--------|---------------|------|-------------|--------------|--------------|---------|
| 1      | 3.129         | BB   | 0.0278      | 3.10031      | 1.73593      | 0.1240  |
| 2      | 3.461         | BV   | 0.0296      | 7.20165      | 3.88174      | 0.2880  |
| 3      | 3.774         | BB   | 0.0281      | 32.67974     | 18.05499     | 1.3067  |
| 4      | 3.869         | BV R | 0.0343      | 1924.39746   | 854.07697    | 76.9460 |
| 5      | 4.148         | VV E | 0.0296      | 9.23029      | 4.76701      | 0.3691  |
| 6      | 4.733         | VB   | 0.0310      | 5.78605      | 2.93345      | 0.2314  |
| 7      | 4.873         | BV R | 0.0361      | 86.35268     | 37.18100     | 3.4528  |
| 8      | 5.366         | BV R | 0.0370      | 386.70047    | 161.17082    | 15.4620 |
| 9      | 5.487         | VV E | 0.0408      | 45.52272     | 16.70822     | 1.8202  |



### Procedure for step 4:

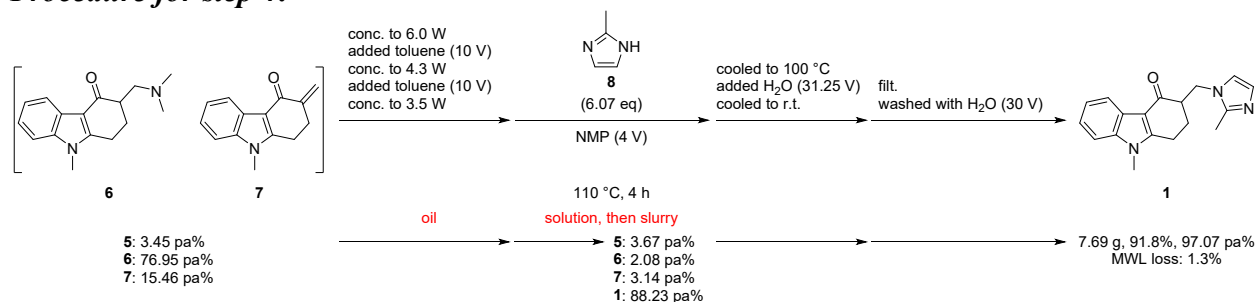

The collected solution was concentrated to 34.05 g, 5.98 W. To the residue, was added toluene (57 mL, 10 V). The reaction mixture was concentrated to 24.64 g, 4.33 W. To the residue, was added toluene (57 mL, 10 V). The reaction mixture was concentrated to 19.69 g, 3.46 W. To the residue, were added NMP (22.8 mL, 4 V) and 2-methylimidazole **8** (14.23 g, 173.30 mmol, 6.07 eq). The reaction mixture was warmed to 110 °C and stirred at 110 °C for 4 hours. The reaction mixture was cooled to 100 °C. To the mixture, was added H<sub>2</sub>O (177.8 mL, 31.25 V) over 10 minutes. The reaction mixture was cooled to r.t., filtered and washed with H<sub>2</sub>O (170.7 mL, 30 V). The solid was air-dried overnight to give ondansetron **1**<sup>3</sup> (7.69 g, 91.8% yield, 97.07 pa%, off-white solid, MWL loss: 1.3%).

### HPLC data at the end point of step 4:

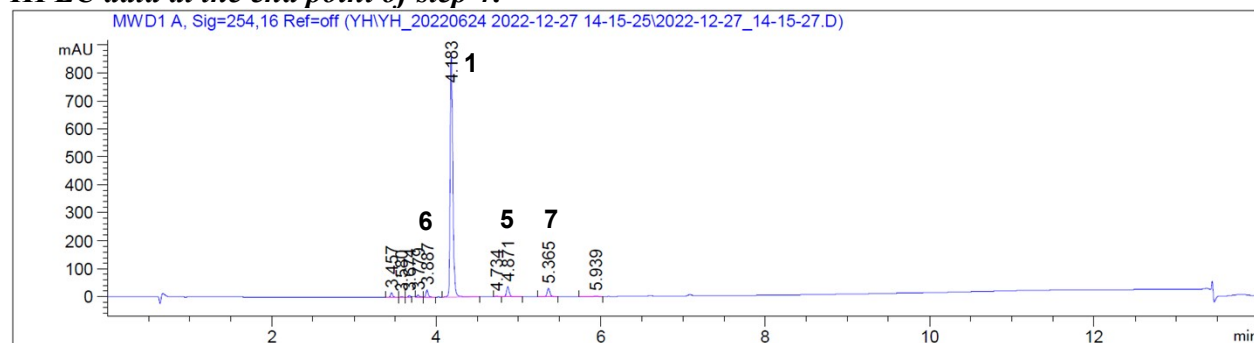

| Peak # | RetTime [min] | Type | Width [min] | Area [mAU*s] | Height [mAU] | Area %  |
|--------|---------------|------|-------------|--------------|--------------|---------|
| 1      | 3.457         | VB R | 0.0287      | 29.20734     | 15.68218     | 1.2742  |
| 2      | 3.580         | BB   | 0.0292      | 4.47421      | 2.46785      | 0.1952  |
| 3      | 3.674         | BV   | 0.0289      | 9.70148      | 5.16617      | 0.4232  |
| 4      | 3.779         | VB   | 0.0314      | 12.57678     | 6.27656      | 0.5487  |
| 5      | 3.887         | BV R | 0.0305      | 47.66397     | 24.70266     | 2.0794  |
| 6      | 4.183         | BV R | 0.0349      | 2022.37585   | 878.58850    | 88.2271 |
| 7      | 4.734         | BV E | 0.0299      | 5.36549      | 2.85551      | 0.2341  |
| 8      | 4.871         | VV R | 0.0364      | 84.02622     | 35.79015     | 3.6657  |

| Peak # | RetTime [min] | Type | Width [min] | Area [mAU*s] | Height [mAU] | Area % |
|--------|---------------|------|-------------|--------------|--------------|--------|
| 9      | 5.365         | VB R | 0.0375      | 72.03531     | 29.47495     | 3.1426 |
| 10     | 5.939         | VB R | 0.0380      | 4.81184      | 1.87369      | 0.2099 |

**HPLC data of isolated ondansetron 1:**

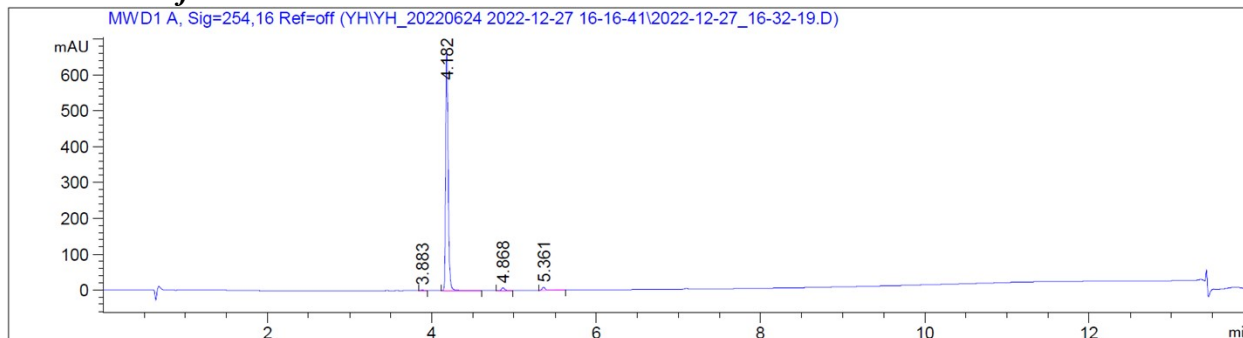

| Peak # | RetTime [min] | Type | Width [min] | Area [mAU*s] | Height [mAU] | Area %  |
|--------|---------------|------|-------------|--------------|--------------|---------|
| 1      | 3.883         | BB   | 0.0305      | 4.17423      | 2.16185      | 0.2754  |
| 2      | 4.182         | BV R | 0.0334      | 1471.43689   | 675.91406    | 97.0651 |
| 3      | 4.868         | BB   | 0.0371      | 17.56759     | 7.29451      | 1.1589  |
| 4      | 5.361         | BV R | 0.0388      | 22.74981     | 8.90006      | 1.5007  |

### <sup>1</sup>H NMR Spectrum of isolated ondansetron 1:

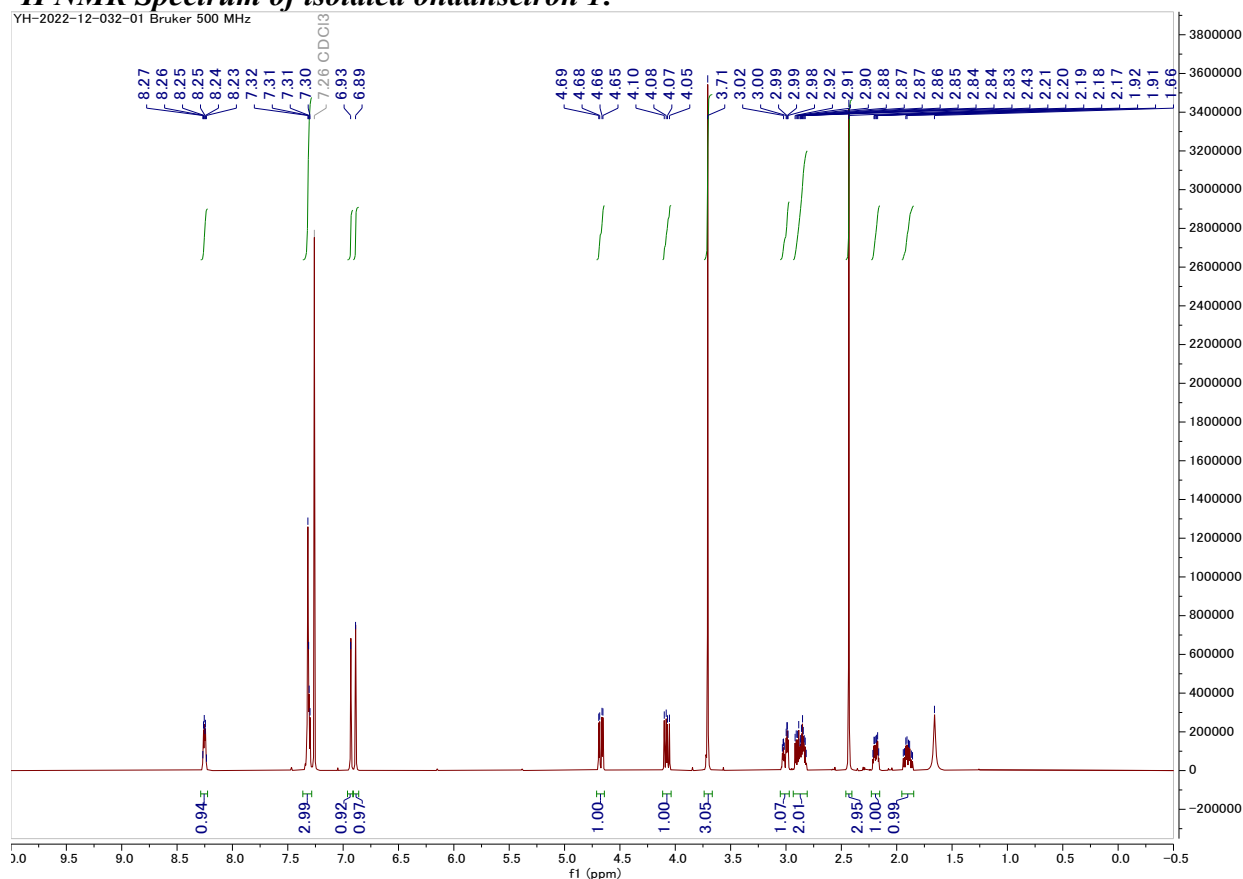

### Procedure for the recrystallization of ondansetron 1:

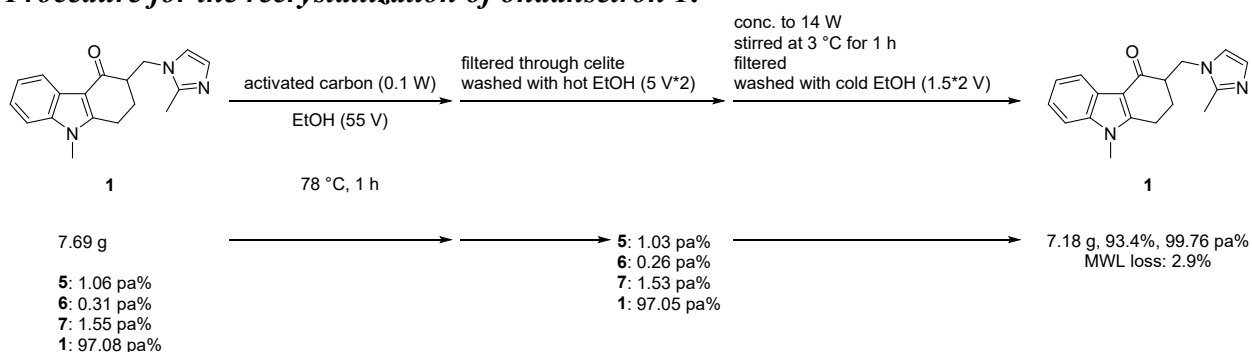

To a 1 L flask, were added ondansetron **1** (7.69 g, 26.21 mmol) prepared in the preceding step, activated charcoal (769 mg, 0.1 W) and EtOH (423 mL, 55 V). The slurry was stirred at 78 °C for 1 h. The hot slurry was filtered through celite and washed with hot EtOH (38+38 mL, 5+5 V). The solution was concentrated to 107.66 g, 14 W. The resulted slurry was cooled to 5 °C and stirred at 5 °C for 1 h. The slurry was filtered and washed with cold EtOH (11.5+11.5 mL, 1.5+1.5 V) to afford ondansetron **1**<sup>3</sup> (7.18 g, 93.4% yield, 99.76 pa%, off-white solid, residual EtOH 4200 ppm, MWL loss: 2.9%). <sup>1</sup>H NMR (500 MHz, CDCl<sub>3</sub>)  $\delta$ : 8.29-8.22 (m, 1H), 7.36-7.28 (m, 3H), 6.93 (d,  $J$  = 1.3 Hz, 1H), 6.89 (d,  $J$  = 1.5 Hz, 1H), 4.67 (dd,  $J$  = 14.6, 4.3 Hz, 1H),

4.08 (dd,  $J = 14.6, 8.9$  Hz, 1H), 3.71 (s, 3H), 3.01 (ddd,  $J = 17.2, 5.2, 3.4$  Hz, 1H), 2.94-2.80 (m, 2H), 2.44 (s, 3H), 2.23-2.15 (m, 1H), 1.96-1.84 (m, 1H).  $^{13}\text{C}$  NMR (125 MHz,  $\text{CDCl}_3$ )  $\delta$ : 191.7, 151.4, 145.1, 137.8, 127.6, 124.8, 123.5, 123.1, 121.7, 119.9, 112.4, 109.5, 47.4, 45.8, 30.0, 26.7, 21.6, 13.5. IR (neat)  $\nu$ : 3125, 3100, 2934, 2872, 1621, 1578, 1529, 1479, 1458  $\text{cm}^{-1}$ . HRMS (DART)  $m/z$ : calcd for  $\text{C}_{18}\text{H}_{20}\text{N}_3\text{O}^+$   $[(\text{M}+\text{H})^+]$  294.1601, found 294.1607.

**HPLC data of isolated ondansetron 1:**

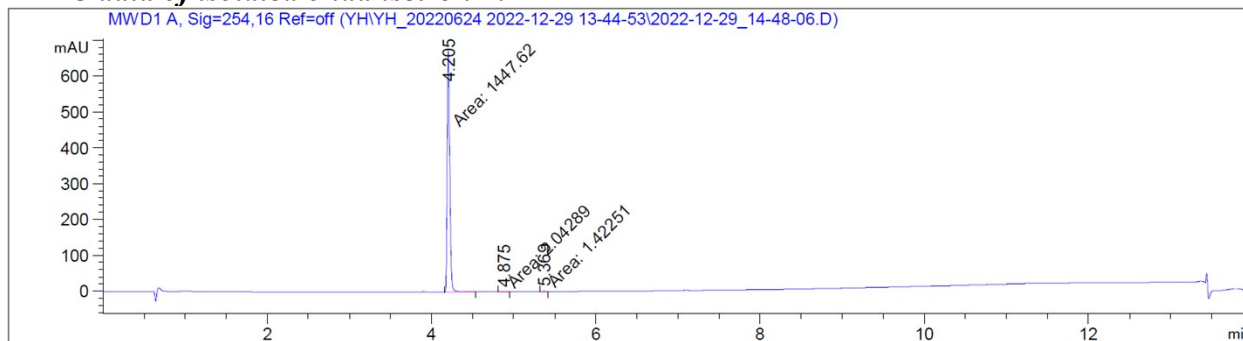

| Peak # | RetTime [min] | Type | Width [min] | Area [mAU*s] | Height [mAU] | Area %  |
|--------|---------------|------|-------------|--------------|--------------|---------|
| 1      | 4.205         | MM   | 0.0357      | 1447.61560   | 675.30463    | 99.7612 |
| 2      | 4.875         | MM   | 0.0521      | 2.04289      | 6.54063e-1   | 0.1408  |
| 3      | 5.369         | MM   | 0.0390      | 1.42251      | 6.07507e-1   | 0.0980  |

# <sup>1</sup>H NMR Spectrum of isolated ondansetron 1:

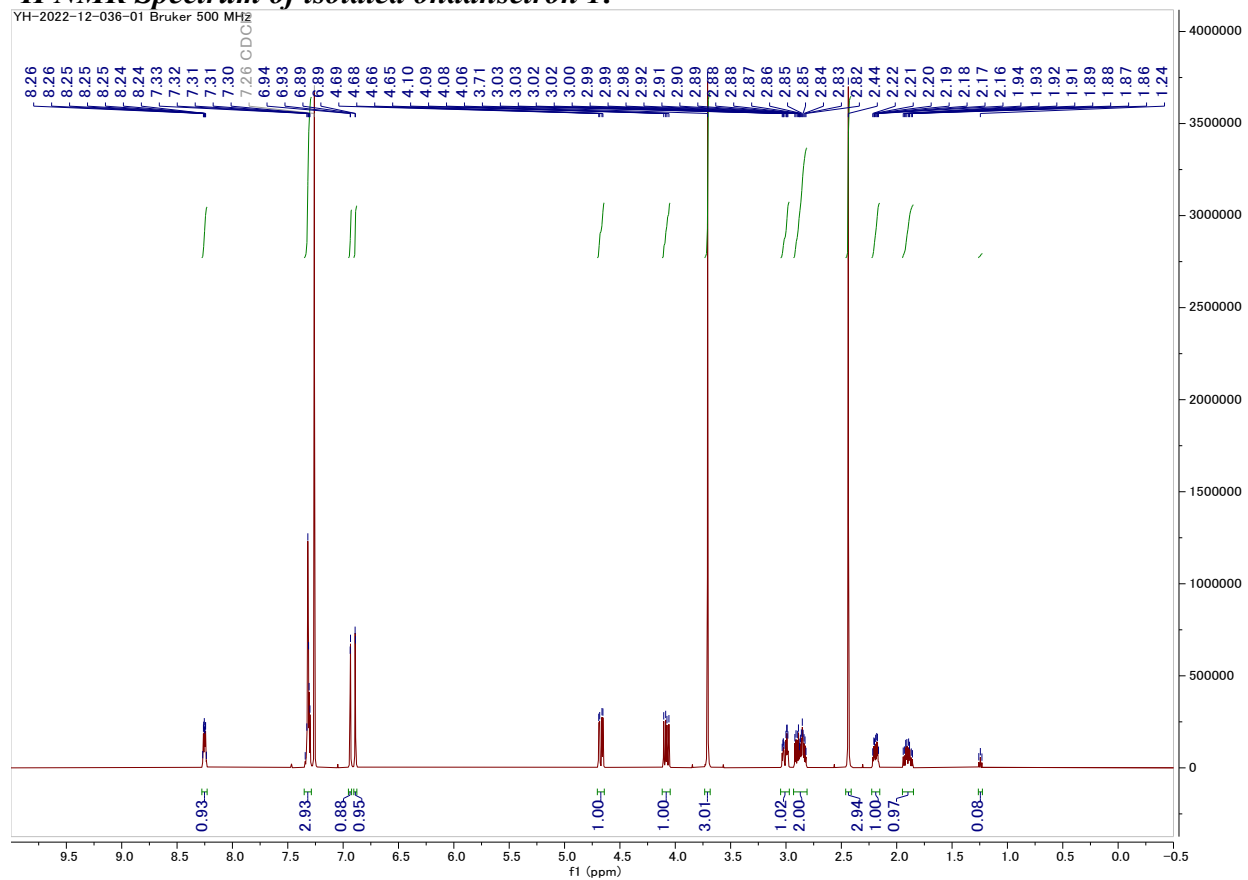

# <sup>13</sup>C NMR Spectrum of isolated ondansetron 1:

YH-2022-12-036-01 Bruker 125 MHz

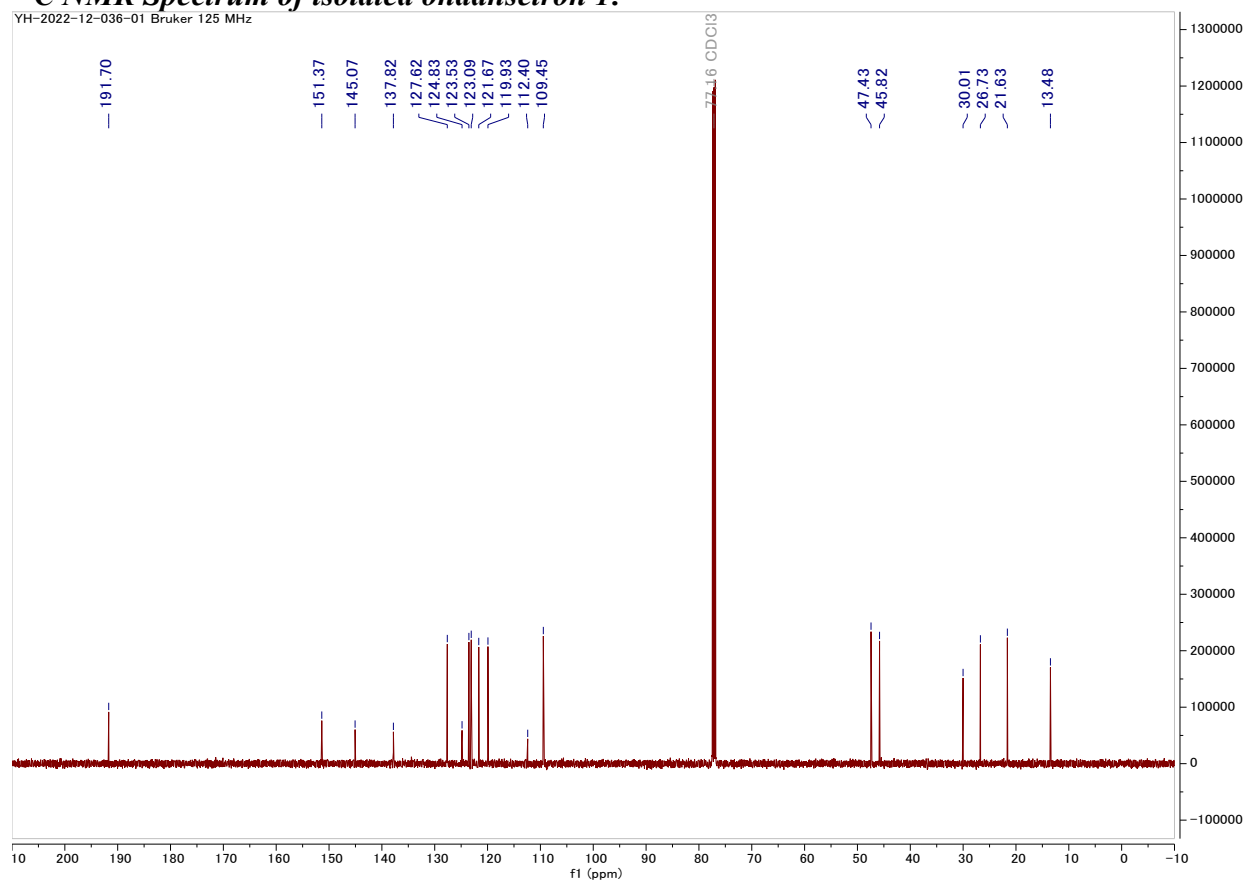

### 3. References

1. Szymor-Pietrzak, D.; Khan, M. N.; Pagès, A.; Kumar, A.; Depner, N.; Clive, D. L. J. Formation of 3-Aminophenols from Cyclohexane-1,3-diones. *J. Org. Chem.* **2021**, *86*, 619-631.
2. Hesoun, D.; Hykl, J. Process for making Ondansetron and intermediates thereof. United States Patent 7041834, 2006.
3. Mohanta, N.; Nair, K.; Sutar, D. V.; Gnanaprakasam, B. A continuous-flow approach for the multi-gram scale synthesis of C2-alkyl- or  $\beta$ -amino functionalized 1,3-dicarbonyl derivatives and ondansetron drug using 1,3-dicarbonyls. *React. Chem. Eng.* **2020**, *5*, 1501-1508.
